1 **TITLE**

2 A CRISPR toolbox for generating intersectional genetic mice for functional, molecular, and  
3 anatomical circuit mapping

4

5 **AUTHOR NAMES AND AFFILIATIONS**

6 Savannah J. Lusk<sup>1</sup>, Andrew McKinney<sup>1</sup>, Patrick J. Hunt<sup>2</sup>, Paul G. Fahey<sup>1</sup>, Jay Patel<sup>1</sup>, Andersen  
7 Chang<sup>3</sup>, Jenny J. Sun<sup>1</sup>, Vena K. Martinez<sup>4</sup>, Ping Jun Zhu<sup>1</sup>, Jeremy R. Egbert<sup>5</sup>, Genevera Allen<sup>6-7</sup>,  
8 Xiaolong Jiang<sup>1</sup>, Benjamin R. Arenkiel<sup>2,8</sup>, Andreas S. Tolias<sup>1</sup>, Mauro Costa-Mattioli<sup>1</sup>, Russell S.  
9 Ray<sup>1,8,9</sup>

10

11 <sup>1</sup>Department of Neuroscience, Baylor College of Medicine, Houston TX

12 <sup>2</sup>Department of Molecular and Human Genetics, Baylor College of Medicine, Houston TX

13 <sup>3</sup>Department of Statistics, Rice University, Houston TX

14 <sup>4</sup>Department of Pharmacology, Baylor College of Medicine, Houston TX

15 <sup>5</sup>Department of Cell Biology, University of Connecticut, Farmington CT

16 <sup>6</sup>Department of Statistics, Computer Science, and Electrical and Computer Engineering, Rice  
17 University, Houston TX

18 <sup>7</sup>Neurological Research Institute, Baylor College of Medicine, Houston TX

19 <sup>8</sup>McNair Medical Institute, Houston TX

20 <sup>9</sup>Corresponding author, [russell.ray@bcm.edu](mailto:russell.ray@bcm.edu)

21 **ABSTRACT**

22 **Background**

23 A full understanding of circuits and cellular mechanisms governing health and disease requires  
24 the dissection and multi-faceted study of discrete cell subtypes in developing and adult animal  
25 models. Recombinase-driven expression of transgenic response alleles represents a significant  
26 and powerful approach to delineate cell populations for functional, molecular, and anatomical  
27 study. In addition to single recombinase systems, the expression of two recombinases in distinct,  
28 but partially overlapping, populations allow for more defined target expression. Although the  
29 application of this method is becoming increasingly popular, the expense and difficulty associated  
30 with production of customized intersectional mouse lines have limited widespread application to  
31 more common allele manipulations that are often commercially produced at great expense.

32 **Results**

33 We present a simplified CRISPR toolkit for rapid, inexpensive, and facile intersectional allele  
34 production. Briefly, we produced 7 intersectional mouse lines using a dual recombinase system,  
35 one mouse line with a single recombinase system, and three embryonic stem (ES) cell lines that  
36 are designed to study how functional, molecular, and anatomical features relate to each other in  
37 building circuits that underlie physiology and behavior. As a proof-of-principle, we applied three  
38 of these lines to different neuronal populations for anatomical mapping and functional *in vivo*  
39 investigation of respiratory control. We also generated a mouse line with a single recombinase-  
40 responsive allele that controls the expression of the calcium sensor Twitch-2B. This mouse line  
41 was applied globally to study the effects of follicle stimulating hormone (FSH) and luteinizing  
42 hormone (LH) on calcium release in the ovarian follicle.

43 **Conclusions**

44 Lines presented here are representative examples of outcomes possible with the successful  
45 application of our genetic toolkit for the facile development of diverse, modifiable animal models.  
46 This toolkit will allow labs to create single or dual recombinase effector lines easily for any cell

47 population or subpopulation of interest when paired with the appropriate Cre and FLP  
48 recombinase mouse lines or viral vectors. We have made our tools and derivative intersectional  
49 mouse and ES cell lines openly available for non-commercial use through publicly curated  
50 repositories for plasmid DNA, ES cells, and transgenic mouse lines.

51 **KEY WORDS**

52 Intersectional genetics, Gene targeting, CRISPR/Cas9, Cre, Flp, Dre, DREADDs, Fluorescent  
53 reporter

## 54 **BACKGROUND**

55 Targeted expression of effector molecules, like fluorescent markers, calcium reporters,  
56 optogenetic actuators, or exogenous ligand-responsive receptors (DREADDs) (1), are  
57 increasingly applied in a variety of fields for greater precision, quantitative expression level  
58 control, and reduced side effects compared to previous methods for labeling and manipulation.  
59 For example, the Cre/LoxP system is used to achieve permanent cell-type restriction by using a  
60 promoter or enhancer to express the site-specific recombinase Cre (2). In such examples, Cre  
61 transgenes are paired with a constitutively active, but conditional, allele where expression of an  
62 effector molecule, such as eGFP, is interrupted by a LoxP-Stop-LoxP cassette that is recombined  
63 out by Cre, which enables expression in targeted, Cre-expressing cells. The use of various  
64 effector molecules in this paradigm enables fluorescent marking, neuronal perturbation, molecular  
65 affinity pull-downs, activity tracking, and other studies (1,3–28).

66 In many fields, it is becoming increasingly clear that recombinase expression based on a single  
67 gene does not offer the resolution needed for a variety of developmental or targeting applications  
68 (29–31). Indeed, application of intersectional genetics has led to new progress in various fields  
69 including neural circuits, cell type lineage, and embryonic development (32–34). Intersectional  
70 genetics adds needed resolution by employing a dual recombinase system using both Cre  
71 recombinase as well as a second recombinase, FLP, to activate a conditional effector allele only  
72 in cells where both recombinases have been expressed in the same cell (though not necessarily  
73 concurrently) (20,35–42). With new methodologies being developed to use Cre and FLP not only  
74 as traditional genetic markers, but also as activity and connectivity markers, unique combinatorial  
75 cell type definitions become possible (43–47). Thus, a resource consisting of multiple dual  
76 recombinase intersectional alleles that each express different effector molecules would add  
77 significant value and needed resolution to our ability to deconstruct neural circuits on multiple  
78 levels. This technology could also be applied to a multitude of other fields where intersectionally

79 defined subpopulations of target cells exist and may play different roles in the measured  
80 outcomes.

81 Although mouse intersectional technology provides relatively benign access to otherwise  
82 inaccessible populations of cells, few laboratories have generated single transgenic or  
83 intersectional genetic mouse lines in house for several reasons. The complexity and size of the  
84 final targeting vectors puts them beyond present (cost-effective) commercial DNA synthesis  
85 capabilities, thus requiring some level of recombinant DNA cloning and precluding straightforward  
86 production of large, high fidelity ssDNA donors that can facilitate pro-nuclear CRISPR-mediated  
87 targeting (48). While intersectional targeting vectors are available from the Addgene plasmid  
88 repository, they are finished vectors that require significant reverse engineering or modifications  
89 for use in a new context or approach. To our knowledge, there are no modular intersectional  
90 targeting vectors that are publicly available for facile and rapid production of new targeting alleles  
91 for the generation of intersectional mouse models. Furthermore, vector stability and other *in vitro*  
92 difficulties combined with the expense and time associated with target vector insertion and mouse  
93 line production limit the number of intersectional mouse lines available for public use. Thus, the  
94 production of intersectional genetic mouse lines has been largely limited to a small number of  
95 pioneering labs or resource rich institutions such as the Howard Hughes Medical Institute and the  
96 Allen Institute for Brain Science (41,49).

97 To address these pitfalls and make the production of intersectional genetic mouse models more  
98 widely feasible, we aimed to produce a freely available resource toolbox consisting of several  
99 intersectional and single-recombinase responsive *Rosa26* targeting vectors for rapid, facile, and  
100 cost-effective generation of complex mouse lines using CRISPR/Cas9-mediated homologous  
101 recombination in mouse embryonic stem cells and early oocytes. In oocytes, genomic  
102 insertions/deletions (in/dels) and short targeted insertions are readily produced whereas large  
103 construct targeting in oocytes has shown more limited but growing success. Additionally, requisite

104 equipment and facilities are difficult to access and out of reach for many investigators. ES cell  
105 approaches are well established and widely available, allowing for rapid screening and  
106 identification, and, if using morula aggregation, require much simpler methodologies and  
107 equipment for mouse generation.

108 Towards this, we produced 7 intersectional mouse lines using a dual recombinase system; one  
109 mouse line with a single recombinase system, and three additional ES cell lines to study how  
110 functional, molecular, and anatomical features relate to each other in building the circuits that  
111 underlie physiology and behavior. As a proof of principle, we applied three of these lines to  
112 different neuronal populations for anatomical mapping and functional *in vivo* characterization in  
113 respiratory control. Next, we globally applied the single recombinase-responsive line, which  
114 controls the expression of the calcium sensor Twitch-2B. Twitch-2B was expressed globally in the  
115 generated mouse line to study the effects of follicle stimulating hormone (FSH) and luteinizing  
116 hormone (LH) on calcium release in the ovarian follicle. The publication and availability of this  
117 technology will allow for the seamless production of a highly diverse group of mouse lines that  
118 can be used to generate animal models of human disease, label specific cell populations for  
119 developmental or connectivity studies, or modulate cellular activity in established disease model  
120 lines, among other possibilities. All reagents and vectors used or generated in this study are now  
121 openly available for not-for-profit research.

## 122 **RESULTS**

123 **Vector design and optimization:** For each of the targeting vectors generated, the intersectional  
124 or Dre-responsive cassette was knocked into a well-established site in the *Rosa26* locus (**Fig. 1**)  
125 (50,51). For positive ES cell clone selection, the targeting vector was simplified and improved in  
126 several ways compared to earlier approaches (52). A simplified neomycin resistance cassette  
127 was integrated into the intersectional cassette before the second LoxP-flanked stop cassette to  
128 utilize the CAG promoter and polyadenylation (*pA*) sequences of the FRT flanked stop cassette,  
129 eliminating prior use of an additional PGK promoter and *Bovine Growth Hormone polyA* (BGHpA)  
130 signal. To use CRISPR/Cas9, we cloned an sgRNA that was close to the 5'/3' homology junction  
131 into the px330 vector (53), which expresses both Cas9 and the subcloned sgRNA  
132 (*px330\_Rosa26\_sgRNA*). A Woodchuck Hepatitis Virus (WHV) Posttranscriptional Regulatory  
133 Element (WPRE) and BGHpA were added at the end of the expression cassette to enhance  
134 effector molecule expression and limit reliance on the disrupted Rosa Locus for transcript  
135 termination (52). The homology arms were significantly shortened to 1Kb to remove repetitive  
136 genomic sequences and stabilize the vector for prokaryotic propagation. Lastly, the terminal non-  
137 homology Diphtheria Toxin A (DTA) chain negative selection cassette was removed, allowing for  
138 the complete targeting vector to be functionally tested via cell culture or *in utero* electroporation,  
139 which was not possible with the presence of the terminal DTA selection cassette without an  
140 additional subcloning step. Redesigned vectors and their Addgene ID numbers are outlined in  
141 Table 1 for public distribution.

142 **Embryonic stem cell electroporation:** We optimized traditional but widespread ES cell targeting  
143 by applying CRISPR/Cas9-mediated HDR (54). Our initial electroporation (EP) experiments using  
144 an earlier, more complex version of the *Rosa26* intersectional targeting vector (containing the  
145 longer 4.2 kb 3' homology arm, DTA, and no CRISPR/Cas9) showed targeting rates ranging from  
146 6-14% (over the course of four electroporations we saw targeting rates of 6/48, 3/48, 7/48, and



147 3/48 clones, mouse strains listed in **Table 2**). To determine the effect of CRISPR/Cas9 on  
148 targeting efficiency, we co-electroporated the *px330\_Rosa26\_sgRNA* vector expressing Cas9  
149 and a *Rosa26* specific sgRNA with the optimized *RR5* targeting vector at four different molar  
150 ratios (0:1, 0.5:1, 1:1, and 10:1), proportionally decreasing the amount of donor vector to  
151 accommodate the increasing *px330\_Rosa26\_sgRNA* vector per EP (18-20 $\mu$ g total DNA per EP  
152 for  $1 \times 10^7$  ES cells) (**Fig 1C**). Under the 0:1 *px330* vector:donor vector condition, we saw a 6%  
153 targeting rate similar to those seen in electroporations without Cas9 and with a much longer 3'  
154 homology arm and negative selection, suggesting that the shortening did not have a large impact  
155 on targeting efficiency under our EP conditions. Under the 0.5:1, 1:1, and 10:1 conditions, we  
156 observed 33%, 27%, and 58% targeting, respectively, suggesting that higher ratios of the Cas9  
157 vector resulted in increased targeting efficiency (**Fig. 1D**).

158 Since the 10:1 ratio had the highest targeting efficiency, despite having significantly less donor  
159 DNA, we used this ratio in subsequent EPs. Because the targeting efficiency was notably high,  
160 we next attempted a single electroporation with multiple vectors targeting the same locus, but  
161 containing equimolar amounts of five different cassettes, while keeping the overall  
162 *px330\_Rosa26\_sgRNA* vector to total donor vector ratio at 10:1. The five vectors consisted of: 1)  
163 a Cre/FLP responsive mutant methionyl-tRNA synthetase (*RR6*) for selective labeling of newly  
164 synthesized proteins; 2) a Cre/FLP responsive modified G-protein coupled receptor (*RR7*); 3) a  
165 Cre/FLP responsive bicistronic reporter with H2B-TagBFP and sfGFP separated by a p2a  
166 element, and tdTomato expressed in the subtractive population (cells that express FLP but not  
167 Cre) (*RR9*); 4) a Dre-responsive tricistronic reporter with H2B-TagBFP, sfGFP, and  
168 synaptophysin-tdTomato separated by p2a elements (*RR11*); and 5) a Dre-responsive bicistronic  
169 reporter with H2B-TagBFP and sfGFP separated by a p2a element (*RR10*). We saw a 52%  
170 targeting efficiency and successful targeting of all five cassettes at varying efficiencies (**Table 3**).  
171 Due to the lower targeting efficiency of *RR7* (2%), we attempted another 10:1 electroporation

172 using the *RR7* donor vector alone and obtained a 63% targeting efficiency (genotyping results  
173 shown in **Fig. 1**). Thus, our results show that we are able to target and recover as many as five  
174 *Rosa* alleles in a single EP, significantly increasing efficiency and reducing costs toward  
175 intersectional mouse generation.

176 **Oocyte targeting:** Given the high efficiency of targeting, we also attempted to create a founder  
177 line (*RR8*) through direct oocyte injection of the optimized *Rosa26* targeting vector with a Cre-  
178 responsive calcium indicator, Twitch (55) (total cassette size without homology arms, 6.5kb),  
179 using pro-nuclear injection of Cas9 protein (30 ng/μl), sgRNA (20 ng/μl), and double-stranded  
180 DNA plasmid (2 ng/μl). A total of 1266 embryos were injected yielding 129 mice, of which 7  
181 genotyped positive for the calcium indicator but only one targeted successfully (<1% targeting  
182 efficiency of mice born), suggesting that direct oocyte injection is inefficient with this system under  
183 the specified parameters.

184 **Off-target analysis:** Genomic sequences that are similar to the sgRNA used for targeted double  
185 stranded breaks may cause unintended gene mutations or editing at off-target sites. To account  
186 for this possibility, we predicted the off-target sites for each sgRNA using the [crispr.mit.edu](http://crispr.mit.edu) tool  
187 and selected the top 5 sites for follow up. We PCR amplified and sequenced these loci from three  
188 correctly targeted ES cell clones and did not detect any genetic changes (**Fig. 2**). While we cannot  
189 rule out off-target effects in other loci, these data suggest that off-target effects are not prevalent  
190 in this setting.

191 **Mouse line derivation:** The goal of our efforts was to produce freely available genetic tools that  
192 delineate and access distinct populations for multi-faceted circuit mapping or functional  
193 characterization studies. With this toolkit in hand, we collectively produced 11 intersectional or  
194 Dre-responsive alleles available as either mouse lines (8) or ES cells (3) (**Table 2**). To perturb  
195 neuron function, we produced three lines that express metabotropic DREADD receptors, hM4D

196 (*RR1*), hM3D (*RR2*), and Rs-EGFP (*RR7*), and a fourth line expressing the ionotropic PSAM  
197 receptor (*RR4*) (24,56,57). Two lines enable molecular characterization: one expresses the  
198 EGFP-L10A fusion protein for ribosomal affinity purification and capture of translating mRNAs  
199 (*RR3*) (58), while the second line expresses methionyl-tRNA synthetase (Met-RS) that  
200 incorporates an artificial amino acid into nascent peptides (*RR6*) (13). One line enables ratiometric  
201 calcium imaging via expression of Twitch2B (*RR8*). Our neuro-anatomical mapping lines  
202 described below also incorporate a tagged histone (H2B), offering the possibility of chromatin  
203 affinity isolations. We created four alleles of differing Cre, FLP, and Dre recombinase responsive  
204 configurations that fluorescently mark distinct cellular compartments for unambiguous cell counts,  
205 morphological characterizations, and projection mapping (*RR5*, *RR9*, *RR10*, *RR11*). The  
206 derivation of lines *RR5*, *RR6*, and *RR7* demonstrated that ES pluripotency was maintained, and  
207 that germline transmission was not diminished in our Cas9-mediated single and multiplexed  
208 electroporations after correctly targeted clones were selected and injected into blastocysts for  
209 chimera generation.

210 **Select mouse line characterization:** Upon dual recombinase expression, the *RR5* tricistronic  
211 multi-color reporter allele expresses three spectrally separated and modified fluorescent proteins  
212 to highlight the nucleus in blue, fill the neuron in green, and emphasize pre-synaptic contacts in  
213 red. At the site of dual recombinase expression, targeted cells are brightly labelled with TagBFP,  
214 sfGFP, and tdTomato where TagBFP fluorescence is constrained to the nucleus by an H2B  
215 fusion, sfGFP is unmodified so that fluorescence is seen throughout the cell body, and tdTomato  
216 is fused to synaptophysin (59) so that fluorescence is excluded from nuclear areas and primarily  
217 seen in projection areas. Individual nuclei can be resolved using blue fluorescence and co-  
218 localization with sfGFP-labeled somata.

219 We used *RR5* to evaluate the functional activity and specificity *in vivo* of our CRISPR/Cas9  
220 approach to generating mouse lines in three distinct contexts; 1) germline recombinase

221 expression, 2) viral recombinase expression, and 3) combinatorial retrograde viral and germline  
222 recombinase expression to target single gene defined neurons by a specific projection field. First,  
223 to demonstrate genetically-restricted, germline expression of recombinases in the intersectional  
224 *RR5* line, we bred the *RR5* line to a double *Dopamine-Beta-Hydroxylase (DBH)<sup>p2aFLPo</sup>*(54); *Bactin-*  
225 *Cre* recombinase driver to express the tricistronic fluorescent cassette in *DBH*-positive  
226 noradrenergic (NA) neurons in the brainstem (**Fig. 3 A-H, Supplemental Figure 1 A-B**). In both  
227 the locus coeruleus (**Fig. 3 A-D**) and the A5 nucleus (**Fig. 3 E-H**) as well as all other noradrenergic  
228 nuclei (not shown), we could cleanly resolve blue nuclei, green cells, and red puncta without the  
229 need for antibody enhancement. Additionally, we bred an intersection of double *Vgat-Cre; Vglut2-*  
230 *FLPo* recombinase expression to the *RR5* line and found the entopeduncular nucleus labeled  
231 green with local projections labeled red and distal projections in the lateral habenula labeled red  
232 (DAPI was applied to help delineate the target field, obscuring the genetic TagBFP signal)(60,61)  
233 (**Fig. 3 I-P**).

234 Second, we verified viral expression of Cre and FLP recombinase where adult *RR5* mice were  
235 stereotaxically injected with equal titer amounts of AAV viruses expressing Cre and FLP (**Fig. 4A,**  
236 **Supplemental Figure 1 C**) into the dentate gyrus (**Fig. 4 B-I**), amygdala (**Fig. 4 J-Q**), and  
237 olfactory bulb (**Fig. 4 R-U**). Clear expression of all three fluorescent proteins were resolved at the  
238 site of injection to the appropriate cellular locations. Third, defining properties of the  
239 subpopulations can be extended to include any combination of gene expression or anatomical  
240 location and projection target when injection of retrograde viral vectors is applied. To utilize this  
241 option, we genetically marked a neuronal subtype defined by the partial overlap of a genetic  
242 selector and projection target by injecting canine adenovirus 2 (CAV2)-Cre virus (62,63) into the  
243 basolateral amygdala of *DBH<sup>p2aFLPo</sup>; RR5* mice that express only FLP in all noradrenergic neurons.  
244 CAV2-Cre virus efficiently transduces axon terminals, thus genetically marking presynaptic  
245 neurons. In this context, only noradrenergic neurons expressing DBH that project to the amygdala

246 express both Cre and FLP and the resulting tricistronic fluorescent cassette (**Fig. 5 A**). We only  
247 observed recombination in the brainstem noradrenergic nuclei and in the locus coeruleus,  
248 primarily on the ipsilateral side (**Fig. 5 B-E**) with some sparse marking on the contralateral side  
249 (**Fig. 5 F-I**), in agreement with a prior study (64). Overlapping red and green puncta (with no blue)  
250 could be seen in the injected amygdala, suggesting that the marked neurons project to the  
251 amygdala, as expected given the nature of the CAV2-Cre virus (**Fig. 5 J-M**). We also observed  
252 collateral projections to several additional areas in the mid and forebrain, including the dorsal  
253 raphé (**Fig. 5 N-Q**), reticulotegmental pontine nuclei (**Fig. 5 R-U**), dentate gyrus (**Fig. 5 V-Y**), and  
254 olfactory bulb (**Fig. 5 Z-CC**). This restriction by retrograde selection was also achieved in other  
255 regions of the brain with a second viral vector. *Vglut2-Cre; RR5* mice were injected with retro-  
256 AAV-Ef1a-FLPo into the lateral hypothalamus (**Fig. 6 A**) where tricistronic expression was clearly  
257 visualized in the cingulate gyrus (**Fig. 6 B-E**), piriform cortex (**Fig. 6 F-I**), and medial habenula  
258 (**Fig. 6 J-M**), indicating these regions as pre-synaptic inputs to the lateral hypothalamus.  
259 Together, these results are in agreement with previous connectivity studies (64).

260 Before *in vivo* characterization of the DREADD systems coded by *RR1* and *RR2*, we first  
261 examined the ability of the *RR1* and *RR2* lines to modulate dopamine beta-hydroxylase (DBH)-  
262 defined noradrenergic neuron activity at the cellular level. We conducted whole-cell recordings  
263 from P30-P60 locus coeruleus neurons expressing one of 3 DREADD receptors: hM3D (*RR2*),  
264 hM4D (*RR1*), or Di (previously published). Each cassette exists with FRT and LoxP bound stop  
265 cassettes, so each line was initially bred with Bactin\_FLPe to remove the FLP-dependent stop  
266 cassette (65). The RC::FrePe was also bred with Bactin\_FLPe to remove the FLP-dependent stop  
267 cassette and then bred to the cre-only dependent DREADD lines (66). This compound allowed  
268 for fluorescent labelling of neurons where Cre recombinase, and thus DREADD receptors, are  
269 present. These compounds resulted in mice wherein GFP and a DREADD were expressed in  
270 *TgDBH-Cre*-defined cells for acute brain slice visualization (See Supplemental Figure 2 for further

271 genetic details). *RC::PDi* (52) was included as it represents a similarly constructed hM4D  
272 intersectional allele, but lacks the modifications and optimizations made in our targeting system  
273 (**Fig. 1 A**). For example, *RC::PDi* contains an additional PGK Promoter and pA signal sequence  
274 flanking neomycin in the first stop cassette and lacks the WPRE element and pA found in *RR1*  
275 and *RR2*. We hypothesized that the addition of a Woodchuck Hepatitis Virus (WHV)  
276 Posttranscriptional Regulatory Element (WPRE) would enhance DREADD effectiveness. After  
277 bath application of 10  $\mu$ M CNO, for *RR2P* (*hM3D*); *RC::epe* we observed a depolarization of  
278 membrane potentials of LC neurons (pre-CNO:  $-62.26 \pm 1.53$ , post-CNO:  $-55.09 \pm 2.16$  mV, paired  
279 t-test:  $p=0.0034$ ,  $n=19$  neurons across 3 mice). After bath application of 10  $\mu$ M CNO, for *RR1P*  
280 (*hM4D*); *RC::epe* we observed a hyperpolarization of membrane potentials of LC neurons (pre-  
281 CNO:  $-56.98 \pm 3.50$  mV, post-CNO:  $-65.3137 \pm 3.60$  mV, paired t-test:  $p=0.046$ ,  $n=10$  neurons  
282 across 3 mice). After bath application of 10  $\mu$ M CNO, for *RC::PDi* (*Di*); *RC::epe* we observed a  
283 hyperpolarization of membrane potentials (pre-CNO:  $-53.71 \pm 2.93$  mV, post-CNO:  $-56.72 \pm 3.42$   
284 mV, paired t-test:  $p = 0.027$ ,  $n=10$  neurons across 3 mice) (**Fig. 7 A-C**). These data confirmed  
285 functional expression of each DREADD system.

286 We next performed whole-body plethysmography to assess changes in respiratory function  
287 caused by CNO-DREADD mediated perturbation of targeted neurons *in vivo*. Significant changes  
288 in any of the calculated respiratory variables demonstrates a measurable effect of DBH-defined  
289 noradrenergic neuronal activity on respiratory control and/ or ventilatory response to CO<sub>2</sub>. If  
290 change was seen in room air, then basal respiratory control was affected by the change in activity  
291 of these neurons. If change were seen in 5% CO<sub>2</sub>, then changes in the activity of these neurons  
292 affected the hypercapnic ventilatory response. *DBH-Cre* defined NA neurons were inhibited by  
293 crossing mouse line *RR1P* to *Tg(Dbh-cre)KH212Gsat* (*TgDBH-Cre*) mice. We observed no  
294 changes under room air conditions (**Fig. 8 A**). However, under hypercapnic conditions, we saw a  
295 reduction in ventilation (**Fig. 8 B**), with decreases in V<sub>T</sub> (Tidal volume) (-26.6%,  $p=0.0021$ , **Fig. 8**

296 **D**),  $\dot{V}_E$  (Minute ventilation) (-26.8%,  $p=0.026$ , **Fig. 8 E**), and  $\dot{V}_E/\dot{V}_{O_2}$  (Ventilatory equivalents for  
297 oxygen) (-28.7%,  $p<0.0001$ , **Fig. 8 G**). No significant differences were observed in body  
298 temperature between experimental animals and sibling controls (**Fig. 8 H**). Notably, sibling  
299 controls showed no difference in respiratory parameters pre- and post-CNO administration.

300 We then tested the applicability of the *RR2P* line *in vivo*. After CNO-DREADD mediated  
301 stimulation of *DBH-Cre* defined neurons, we saw significant increases under room air ventilation  
302 (**Fig. 9 A**) in  $V_f$  (Ventilatory frequency) (+28.1%,  $p=0.0076$ , **Fig. 9 C**),  $V_T$  (+43.3%,  $p=0.00077$ ,  
303 **Fig. 9 D**),  $\dot{V}_E$  (+83.6%,  $p<0.0001$ , **Fig. 9 E**), and  $\dot{V}_{O_2}$  (Oxygen consumption) (+50.9%,  $p<0.0001$ ,  
304 **Fig. 9 F**). The increase in  $\dot{V}_E$  was proportional to the increase in  $\dot{V}_{O_2}$ , however, so  $\dot{V}_E/\dot{V}_{O_2}$  did not  
305 change (**Fig. 9 G**). Under hypercapnic conditions, as compared to pre-CNO values,  $\dot{V}_{O_2}$  was  
306 increased (+37.2%,  $p=0.0015$ , **Fig. 9 F**), resulting in a reduced  $\dot{V}_E/\dot{V}_{O_2}$  (-24.2%,  $p=0.04$ , **Fig. 9 G**).  
307 We also observed a deficit in body temperature in *DBH-Cre; RR2P* animals 30 minutes after the  
308 end of the assay at room temperature (~1.5 hrs after CNO injection) as compared to sibling  
309 controls (**Fig. 9 H**), but not immediately at exit from the respiratory chamber, which is kept at a  
310 thermoneutral temperature, 30-32°C. Sibling controls showed no difference in respiratory  
311 parameters pre- or post-CNO administration. The respiratory phenotypes seen here clearly  
312 demonstrate an acute and cell autonomous involvement of the whole NA system in CO<sub>2</sub>  
313 chemosensitivity and baseline metabolism while avoiding the confounds of developmental  
314 compensatory events or off-target effects.

315 Finally, we characterized a fourth line, produced by oocyte CRISPR-mediated recombination to  
316 express the Twitch2B ratiometric calcium indicator upon Cre recombinase expression. Calcium  
317 signaling was recorded in outer granulosa cells surrounding an oocyte taken from a germline  
318 recombined (*RR8; Bact\_Cre*) mouse line (**Fig. 10 A**). Upon application of 10μM ionomycin in the  
319 presence of 10mM CaCl<sub>2</sub>, the YFP/CFP ratio increased more than 3-fold (**Fig. 10 B**). The data

320 demonstrate how the targeting system here can be used to build conditional mouse lines that are  
321 useful beyond the nervous system and throughout the body (67).

322 Collectively, these data highlight how our single recombinase and intersectional lines can be used  
323 to functionally assess dispersed and difficult to access populations, setting the stage for further  
324 characterization and dissection of a variety of systems in a given measured outcome through  
325 intersectional subdivision by genetic or viral methods.



## 326 **DISCUSSION**

327 **Vector design and optimization:** Our tricistronic mouse line vector (*RR5*) was a complex vector  
328 to design. Thus, the discussion of its construction applies to the other simpler vectors and best  
329 describes choices made to optimize the vectors. Our initial goal was to create an intersectional  
330 mouse strain expressing three fluorescent components to highlight the nucleus, whole neuron,  
331 and presynaptic contacts, enabling facile study of cell counts, cellular morphology, and axonal  
332 and projection targets (*RR5* consisting of H2B-TagBFP, sfGFP, and synaptophysin-tdTomato  
333 separated by p2a elements) without the need for signal amplification using antibodies. However,  
334 likely due to the high number of repetitive elements in the *Rosa26* 3' homology arm and the high  
335 complexity and repetitive components of the intersectional cassette (i.e. two stop cassettes  
336 consisting of multiple SV40 polyadenylation sequences, tdTomato protein dimer, double loxP and  
337 FRT sites, and two p2a self-cleaving peptides separating the elements), we had no success in  
338 stably subcloning the intersectional cassette into a low copy vector (p15a ori) containing the  
339 original *Rosa26* homology arms (1.1kb 5' homology arm and 4.2 kb 3' homology arm) and DTA  
340 negative selection gene (52). Thus, we sought to make several improvements on the prior  
341 approaches used to build intersectional genetic mice. First, we sought to stabilize the vector by  
342 shortening the homology arms and eliminating repetitive genomic elements found at the *Rosa26*  
343 locus. Second, we removed the DTA negative selection terminal non-homology to eliminate the  
344 need to validate intersectional cassettes separately before placing the cassette in the targeting  
345 vector. Third, we reduced the size of the selection cassette. Prior intersectional constructs carried  
346 an additional PGK promoter and BGHpA tail for neomycin expression. We eliminated both  
347 promoter and BGHpA as the functions of these elements can easily be served by the CAG  
348 promoter and SV40pA in the stop cassette. With smaller homology arms, it was possible that our  
349 targeting efficiency would fall. Therefore, we introduced a CRISPR/Cas9 targeting strategy to  
350 enhance homologous recombination in either ES cells or oocytes. Surprisingly, in ES cells, the

351 shorter homology arms performed equally well as the full-length homology arms (see discussion  
352 below). The resulting strategy offered a simplified, smaller, and highly stable vector that remains  
353 efficient at targeting the *Rosa26* locus. Through this optimization process we built a set of baseline  
354 vectors that can be used to build any intersectional genetic targeting allele rapidly and  
355 inexpensively by simply cloning in a cDNA of interest into one or both of the multiple cloning sites  
356 for both intersectional and subtractive expression.

357 **Embryonic stem cell electroporation:** While CRISPR strategies are widespread for knockout  
358 mutations and small deletions and insertions in mouse zygotes, consistent knock-in of large  
359 targeting cassettes (>4kb) still remains a challenge with fewer but increasing successes (68–70).  
360 To address this limitation, our new multiplexed methodology enabled us to: **1)** simplify our base  
361 targeting vector to less than 5kb in total length; **2)** see successful targeting of added cassettes up  
362 to 11kb; **3)** increase the rate of targeting by 5-10 fold over previous *Rosa26* targeting attempts  
363 (that used a significantly longer 3' homology arm) under our ES cell strain and conditions; and **4)**  
364 further reduce cost by co-electroporating five different targeting vectors in a single ES cell  
365 electroporation that were easily resolved to produce new mouse lines. While targeting rates for  
366 the *Rosa26* locus can vary greatly in the literature, we compare only to our own experiments, as  
367 significant variability in targeting efficiency from lab to lab or facility to facility can arise from the  
368 several factors in ES cell electroporation ranging from electroporation conditions (e.g. buffer ionic  
369 strength, adjuvants, field strength, field duration, field shape, square wave vs exponential decay,  
370 etc.) to culture conditions (ES cell strain and genetic background, feeder type, media composition,  
371 inclusion of LIF, etc.). Notably, when we co-electroporated a CRISPR/Cas9 plasmid to facilitate  
372 targeting, there was a proportional increase in targeting efficiency despite reduced amounts of  
373 targeting vector (total DNA in the EP was capped at 18-20  $\mu\text{g}$  per EP). At the highest efficiencies,  
374 we could further subdivide the small amount of targeting vector across multiple plasmids, which  
375 allowed us to introduce and recover as many as five vectors in a single EP. This multiplexed

376 approach significantly reduced the costs of mouse production via ES cells. With these goals met,  
377 multiplexed ES cell targeting enables the rapid and high throughput production of intersectional  
378 alleles that can be readily distributed throughout the mouse research community for further  
379 studies.

380 **Oocyte targeting:** Oocyte injection was only attempted with one line, *RR8*. Less than 1% of the  
381 embryos contained a properly targeted vector, which in our experience suggests that direct oocyte  
382 injection is not efficient. Future optimization and the development of new technologies may  
383 increase the efficiency of targeting for more rapid generation of transgenic mice; for example, a  
384 study showed 10-20% targeting of 8-11kb cassettes to the *Rosa26* locus in oocytes using longer  
385 homology arms, while another showed successful targeting of a 5.5kb cassette into the *Rosa26*  
386 locus in rats with co-injection of two ssDNA oligos (70,71). As noted above, there can be  
387 significant variability in targeting across labs based upon a variety of factors including background  
388 strain (vs strain from which the homology arms are derived), the use of Cas9 mRNA or protein,  
389 and site of injection (pro-nucleus vs cytoplasm, single vs 2-cell stage). Thus, our outcomes here  
390 may reflect our core facility capabilities as much as inherent limitations in consistent Cas9  
391 mediated oocyte targeting of large constructs. The successful outcomes here and in a prior  
392 publication demonstrate the use of the system to develop lines capable of functional imaging (67).

393 **Select mouse line characterization:** Intersectional expression of fluorescent proteins (FPs) has  
394 been used to great effect for anatomical characterizations of targeted neuron populations (66,72).  
395 Characterizations aimed at counting or highlighting single cells or cell populations made with a  
396 single FP can be made difficult, however, in cases where cell, axon, or dendrite density (neuropil)  
397 is high. Usually, one or two FPs are deployed to either fill the cell or highlight specific features,  
398 which necessitates the use of multiple reporter alleles to clearly observe cell number, morphology,  
399 and projections. To ameliorate these issues, we sought to create a mouse line (*RR5*) that  
400 highlights three specific features in an intersectionally defined neuron. Overall, this novel three-

401 color mouse line enables intersectional and simultaneous labeling of three subcellular  
402 compartments. The polycistronic fluorescent labeling cassette gives unambiguous cell counts and  
403 clear visualization of cell morphology, axonal projections, and synaptic contacts. The strength of  
404 expression of all three colors is likely due to the use of p2a elements, rather than IRES elements,  
405 which cause expression level reduction. Reduced expression from an IRES may stem from cryptic  
406 splice elements in the IRES that could interact with the intron in the CAG promoter or splice  
407 acceptors in some stop cassettes (73). Our use of P2A appears to bypass those issues as all  
408 three fluorescent proteins could be readily visualized without additional enhancement as  
409 compared to other approaches (38).

410 We also show that combinations of germline, viral, and retrograde viral expression of  
411 recombinases in the *RR5* line can all be used to clearly map the shared innervation of multiple  
412 regions by a small subset of genetic, projection, and/ or intersectionally defined neurons. In  
413 contrast to prior intersectional studies using two genetic delimiters to define a subpopulation with  
414 a single fluorescent protein (with or without an inert retrograde marker injected into separate sites  
415 in the brain), our approach enables facile collateral mapping across the whole nervous system  
416 with higher resolution that is growing in popularity (36,64,72). These results demonstrate that  
417 despite the high complexity and repetitive nature of the *RR5* cassette, we could efficiently target  
418 this allele, the allele remains stable through germline transmission, and it is responsive to Cre  
419 and FLP recombinase expression. The restriction of expression to anatomically defined NA  
420 neurons as a whole or as a projection subset further establishes the recombinase specificity of  
421 our targeting schematic. This approach should also translate equally well to further anatomical,  
422 functional, and molecular characterizations of NA and other subtypes defined by their projection  
423 patterns with the use of the additional lines reported here.

424 The outcomes of either inhibiting (*RR1P; TgDBH\_Cre*) or stimulating (*RR2P; TgDBH\_Cre*) NA  
425 neurons as defined by *TgDBH\_Cre* strongly support the functionality of these two lines in an *in*

426 *vivo* setting. Noradrenergic (NA) neurons are strongly implicated in control of respiratory  
427 homeostasis and chemosensitivity (8,74–80). Previous studies focused on demonstrating the role  
428 of NA neurons in breathing bear methodological caveats such as lack of resolution due to overly  
429 broad lesions or injections (81), developmental and non-cell-autonomous compensation after  
430 gene mutations, restraint or anesthesia *in vivo*, and they typically lack concurrent metabolic  
431 measurements ( $\dot{V}_E/\dot{V}_{O_2}$ ) (82), thus direct comparisons are difficult. Nonetheless, previous work  
432 has been reiterated in many ways with our results here in that focal pharmacological NA lesions  
433 decreases respiratory frequency and hypercapnic ventilatory response (76). Here we show in  
434 conscious, unrestrained mice that inhibition of *TgDBH\_Cre*-defined noradrenergic neurons led to  
435 significantly reduced tidal volume, minute ventilation, and  $\dot{V}_E/\dot{V}_{O_2}$  following hypercapnic exposure.  
436 On the other hand, activation of *TgDBH\_Cre*-defined noradrenergic neurons led to significantly  
437 increased respiratory rate, tidal volume, minute ventilation,  $\dot{V}_{O_2}$ , and  $\dot{V}_E/\dot{V}_{O_2}$  in the room air  
438 breathing condition. These changes likely stem from a combined increase in central and  
439 peripheral (sympathetic) outflow increasing overall metabolic rate ( $\dot{V}_{O_2}$ ). Although breathing and  
440  $\dot{V}_{O_2}$  are both increased, a small but significant mismatch occurs in hypercapnia suggesting that  
441 global excitation may destabilize hypercapnic reflexes as well. Notably, after removal from the  
442 thermo-neutral recording chamber, the body temperature dropped significantly. This drop is  
443 consistent with prior studies that show central NA outflow to the hypothalamus negatively  
444 regulates body temperature (83,84). The magnitude of changes seen for both stimulation and  
445 inhibition of *TgDBH\_Cre* defined NA neurons in various breathing parameters, particularly for  
446 hypercapnia, is in line with expectations of a highly redundant chemosensory system in the  
447 respiratory network along with the fact that the NA system is neuromodulatory in nature  
448 (37,52,85–88). Altogether, the numerous breathing, metabolic, and temperature changes  
449 observed support the functionality of these lines for *in-vivo* chemogenetic manipulations. These  
450 data represent modulation of the noradrenergic system that, methodologically, significantly

451 deviates from previously published studies interrogating this system and provides an alternative  
452 to those investigating control of breathing that reduces the influence of unintended effects.

453 In conclusion, the methods presented here represent a significant improvement in feasibility and  
454 affordability for labs to generate their own intersectional mouse models for application in a variety  
455 of fields. Our vector design and application allow for large cassettes to be targeted to the *Rosa26*  
456 locus with high throughput, increased efficiency, germline transmission, and preserved  
457 pluripotency. These protocols and techniques can be used to investigate most, if not all, neural  
458 circuits in the context of development and/ or disease. Implementing these techniques also serves  
459 as an alternative to cost-prohibitive commercially available vectors and mouse lines. Together,  
460 we present a facile, cost-effective method for producing gene specific intersectional mouse lines.

## 461 **CONCLUSIONS**

462 During development, many distinct cellular subtypes arise and intercalate to create the complex  
463 cells, organs, and organ systems that constitute our behavior and physiology. Key to  
464 understanding this organization and how it may be perturbed in diseases is the ability to identify  
465 and access discrete cell subtypes in the developing and adult mouse for multi-faceted studies. It  
466 is now clear that even within narrowly defined cell types once thought as homogeneous,  
467 significant diversity is found at multiple levels including genetic and molecular signatures, activity  
468 patterns, synaptic connectivity, and projection patterns. Given this complexity, it is often difficult  
469 to define and access specific cellular populations for study, particularly during embryogenesis,  
470 where *in utero* development makes access problematic. In neuroscience, the power of studying  
471 combinatorially defined neuronal populations increases significantly when multiple distinct  
472 neuronal features, such as birthdate, collateral projection targets, molecular profiles, or a  
473 functional requirement in a given physiological process or behavior can be examined in parallel  
474 to reveal deeper insights into the mechanisms involved in the establishment and maintenance of  
475 neural circuit organization. However, the ability to carry out such studies is restricted by the limited  
476 number of publicly available intersectional mouse lines as well as the inherent difficulty in  
477 developing new intersectional alleles.

478 We present a novel CRISPR/Cas9-mediated system for consistently targeting large cassettes to  
479 the *Rosa26* locus for high throughput and parallel generation of intersectional and conditional  
480 mouse lines. These studies demonstrate that CRISPR/Cas9 can be used to increase targeting  
481 efficiency at the *Rosa26* locus in mouse embryonic stem cells with shortened 1-1.2 kb homology  
482 arms while preserving pluripotency and the ability to transmit alleles via the germline. This  
483 technology allows for the opportunity to generate mouse lines that express a wide range of  
484 effector molecules in various cell types, enabling the developmental, anatomical, molecular, and  
485 functional characterization of cellular organization in behavior and physiology. To democratize the

486 generation of intersectional and conditional targeted ES cells and mouse lines, we have  
487 generated a publicly available vector toolkit for single-step cloning into *Rosa26*-targeting vectors  
488 for double and single-recombinase responsive cassettes (**Table 1**). We have also generated  
489 several mouse lines available, without restriction, to the not-for-profit research community  
490 enabling high specificity intersectional access of neuronal and other populations for cross  
491 correlative mapping approaches using functional neuronal perturbation, molecular profiling, and  
492 anatomical characterizations for multifaceted studies (**Table 2**). Overall, these resources and the  
493 modular nature of the intersectional approach make rapid and low-cost production of large  
494 numbers of intersectional alleles possible that can be efficiently distributed as ES cells or mouse  
495 lines throughout the mouse research community. All vectors (Addgene; 97007-97012, 99142),  
496 mouse lines (MMRRC; 043513-043519), and ES cells (BCM ES Cell Core Facility) have been  
497 made publicly and unconditionally available to the academic research community.



## 498 **METHODS**

499 **Construction of targeting and Cas9 vectors:** The simplified *Rosa26* targeting vector was  
500 derived using standard cloning procedures from a targeting vector used in previous studies (52)  
501 consisting of a p15a origin of replication, kanamycin selection cassette, DTA negative selection  
502 cassette, and *Rosa26* homology (1081 bp 5' homology arm and 4342 bp 3' homology arm). The  
503 total vector size was 9084 bps. The DTA was removed and the 5' homology arm was shortened  
504 to 1025 bp fragment (deleting the sgRNA target sequence (chr6:113,076,062-113,077,087  
505 GRCm38/mm10)) while the 3' homology arm was shortened to 1231 bps (chr6:113,074,801-  
506 113,076,032 GRCm38/mm10), maintaining the insertion site within the first intron and reducing  
507 the total vector length to 4694 bps and eliminating a number of repetitive regions that often  
508 resulted in vector instability when constructing intersectional targeting vectors.

509 For the Cas9 expressing vector, we selected an sgRNA target sequence that was close to the 5'  
510 and 3' junction of the *Rosa26* gene locus (ACTGGAGTTGCAGATCACGA with PAM motif GGG;  
511 chr6:113,076,040-113,076,05 GRCm38/mm10). The selected sgRNA was cloned into the BbsI  
512 sites of the px330 vector that expresses Cas9 (final vector is called *px330\_Rosa26\_sgRNA*).

513 Knock-in cassettes were assembled in either 1) a previously used intersectional template plasmid  
514 (*RR1-4*, *RR6-7*); 2) a newly constructed intersectional template plasmid with neomycin promoter  
515 and pA elements removed (*RR5* and *RR8*); or 3) a constructed Dre-responsive template plasmid  
516 (*RR9* and *RR10*). The intersectional plasmid consisted of a ubiquitous *CAG* promoter sequence;  
517 an *FRT*-flanked stop cassette consisting of a PGK-neo sequence (for positive selection of  
518 targeted ES cells) and three *SV40 pA* sequences; a *LoxP*-flanked stop cassette containing  
519 mCherry and a PBS302 stop cassette; and a cloning site for insertion followed by a *WPRE* and  
520 *BGHpA* sequence. The new intersectional template consisted of a ubiquitous *CAG* promoter  
521 sequence; an *FRT* flanked stop cassette consisting of a neomycin sequence and *His3\_SV40 pA*;

522 a *LoxP*-flanked subtractive cloning site stop cassette consisting of a *His3\_SV40 pA*; and a cloning  
523 site for insertion followed by *WPRE* and *BGHpA* sequences. The Dre-responsive template  
524 consisted of a *Rox*-flanked stop cassette consisting of a neomycin sequence and PBS302 stop  
525 cassette, and a cloning site followed by a *WPRE* and *BGHpA* sequence.

526 For assembly of complete targeting vectors, the cDNAs of interest were PCR amplified and cloned  
527 into the corresponding vector. The intersectional or Dre-responsive cassettes were then cut out  
528 with *PacI* or *PacI/Ascl* and cloned into the shortened *Rosa26* targeting vector.

529 To facilitate single step cloning of complete targeting vectors, we generated a vector toolkit (**Table**  
530 **1**) by constructing and moving empty *CAG* cassettes in the *Rosa26* targeting vector. We  
531 generated four template vectors with neomycin resistance: 1) a Cre/FLP responsive targeting  
532 vector; 2) Cre only; 3) FLP only; and 4) Dre-responsive targeting vector. The intersectional  
533 template vector consists of the *CAG* promoter, an *FRT*-flanked neomycin resistance gene and  
534 stop cassette, a subtractive cloning site (*EcoRV*) and stop cassette flanked by *LoxP* sites, an  
535 intersectional cloning site (*PmeI*), and *WPRE* and *BHGpA* elements. Each single template vector  
536 consists of the *CAG* promoter, stop cassette(s) and neomycin resistance cassette flanked by  
537 recombinase sites, cloning site (*SwaI*), and *WPRE* and *bgh polyA* elements. Additionally, for  
538 possible direct oocyte injections we also generated a Cre/FLP responsive targeting vector that  
539 does not contain a neomycin resistance gene, with a subtractive cloning site (*EcoRV*) and  
540 intersectional cloning site (*SwaI*). All cloning sites are blunt restriction enzyme sites for cloning  
541 facilitation.

542 Sequences of the template vectors and *px330* vector and plasmids are available through Addgene  
543 (provisional ID #s 97007-97012, 99142).

544 **Generation of knock-in mice:** Embryonic stem (ES) cells (AB2.2) were electroporated with 15-  
545 20  $\mu$ g of varying ratios of the *px330\_Rosa26\_sgRNA* vector to the targeting vector. Neomycin

546 selected clones were screened for homologous recombination using PCR genotyping. Targeted  
547 clones were identified using PCR genotyping for 5' and 3' targeting from outside the homology  
548 arm and were considered to be successful targeting events if positive for both 5' and 3'  
549 genotyping. We used pairs 5'CGCCTAAAGAAGAGGCTGTG (Rosa26-F) and  
550 5'GGCGTACTTGGCATATGAT (CAG-R), producing a 1450 bp band; and  
551 5'AATCAACCTCTGGATTACAAAATTT (WPRE-F) and 5'TGGCTCCTCTGTCCACAGTT  
552 (Rosa26-R), producing a 2472 bp band.

553 Select targeted clones were microinjected into C57B1/J6 blastocysts and chimeric males were  
554 bred to wildtype C57B1/J6 females to achieve germline transmission.

555 **Pronuclear injection:** We constructed a targeting vector by cloning a calcium indicator, Twitch-  
556 2B (55), into the Cre responsive *Rosa26* targeting vector. The Baylor College of Medicine  
557 Embryonic Stem (ES) Cell Core generated the *Rosa26*-specific sgRNA and Cas9 protein for  
558 injection. Pronuclear injections were performed by the Baylor College of Medicine Genetically  
559 Engineered Mouse (GEM) Core using the following parameters: 30 ng/μl Cas9 protein, 20 ng/μl  
560 sgRNA, and 2 ng/μl dsDNA plasmid. Potential founders were screened for targeting as described  
561 above.

562 **Breeding, genetic background, and maintenance of mice:** We maintained colonies of select  
563 mouse strains by backcrossing to C57BL/6J mice. For routine genotyping, we carried out PCR  
564 amplification of DNA from ear punch preparations using the boiling alkaline lysis procedure.  
565 *Rosa26* specific primers for the mice were 5'-GCACTTGCTCTCCCAAAGTC, 5'-  
566 GGGCGTACTTGGCATATGAT, and 5'-CTTTAAGCCTGCCAGAAGA, and yield a 495 bp band  
567 (targeted) and 330 bp band (wt). For histology experiments, *RR5* mice were bred to  
568 *DBH<sup>p2aFLPo</sup>*(54); *B6N.FVB-Tmem163<sup>Tg(AC<sup>TB</sup>-cre)2Mrt/CjDswJ</sup>* (*Bactin-Cre*) and *DBH<sup>p2aFLPo</sup>* mice. For  
569 plethysmography experiments, *B6.FVB(Cg)-Tg(Dbh-Cre)KH212Gsat/Mmucd* (*DBH-Cre*) mice

570 were mated with homozygous Cre-only responsive *RR1P* and *RR2P* mice (after crossing  
571 intersectional alleles to *B6;SJL-Tg(ACTFLPe)9205Dym/J* [JAX 003800] mice to recombine out  
572 the FLP-responsive stop cassette followed by homozygosity) to derive animals in which all mice  
573 carried the Cre-responsive hM4D or hM3D allele. Sibling animals that did not inherit the *Cre* allele  
574 were used as control animals to the *Cre* positive offspring. For electrophysiology experiments,  
575 *DBH-Cre; RR2P* mice were mated to *RC::ePe* mice expressing a floxed eGFP. Cre-specific  
576 primers were 5'-ATCGCCATCTTCCAGCAGGCGCACCATTGCCC and 5'-  
577 GCATTTCTGGGGATTGCTTA and yielded a 550 bp band if positive. FLPo-specific primers were  
578 5'CACGCCAGGTA CTTGTTCT and 5'CCACAGCAAGAAGATGCTGA and yielded a 226 bp  
579 band if positive.

580 Established mouse lines reside at the Mutant Mouse Regional Resource Center (MMRRC) and  
581 will be unconditionally available to the academic research community (MMRRC 043513-043519).  
582 Targeted ES cells have been archived and are available upon request under the condition that  
583 any new mouse lines are deposited in a public repository.

584 All animal experiments were performed with the approval of IACUC.

585 **Off-target analysis:** Off-target sequences were identified using the Optimized CRISPR Design  
586 tool (crispr.mit.edu). The top 5 sequences for each sgRNA were amplified from selected targeted  
587 ES cells and sequenced to determine if any mutations or changes occurred in off-target sites.

588 **Viral injection:** To test the functionality of the *RR5* mouse strain, adult *RR5* mice were injected  
589 with equal titers of AAV9-hSyn-FLPo and AAV1-hSyn-Cre viruses (obtained from M. Xue at BCM,  
590 250 nl at  $1.12 \times 10^{12}$  GC/mL) into the dentate gyrus (coordinates from bregma AP=-2.70, DV=-  
591 2.12, ML=1.84) and with equal titers of AAV-EF1a-Cre-WPRE and AAV-EF1a-FLPo-WPRE (UNC  
592 Vector Core, 250 nl at  $5.06 \times 10^{11}$  GC/mL) into the amygdala (coordinates from bregma AP=-1.06,  
593 DV=-4.61, ML=-2.86) and allowed to incubate for 7-14 days. For expression in the olfactory bulb,

594 adult *RR5* mice were injected with AAV-CAG-Cre (obtained from Neuroconnectivity Core at Jan  
595 and Dan Duncan Neurological Research Institute, AAV2/9 690  $\mu$ L at  $5.37 \times 10^{13}$  pp/mL) and AAV-  
596 Ef1a-Flp (obtained from Neuroconnectivity Core at Jan and Dan Duncan Neurological Research  
597 Institute, AAV2/9 690  $\mu$ L at  $7.16 \times 10^{11}$  pp/mL) into the core of the olfactory bulb (coordinates from  
598 bregma AP=4.5mm, DV=-2.25mm, ML= $\pm$ 0.8mm) and allowed to incubate for 14 days. For the  
599 CAV2-Cre virus experiments, *RR5*; *DBH<sup>p2aFLP</sup>* mice were injected with CAV2-Cre virus (IGMM  
600 Viral Core, 500 nL at  $6.0 \times 10^{12}$  pp/mL) into the amygdala (coordinates -2.86, -1.06, -4.61) and  
601 allowed to incubate for 17 days. For the Retro-AAV-Ef1a-FLPo virus experiments, *RR5*;  
602 *Vglut2\_Cre* mice were injected with Retro-FLPo virus (obtained from Neuroconnectivity Core at  
603 Jan and Dan Duncan Neurological Research Institute, 690  $\mu$ L at  $1.49 \times 10^{12}$  pp/mL) into the lateral  
604 hypothalamic area (coordinates from bregma AP=-1.22mm, DV=-5.12mm, ML= $\pm$ 0.97mm) and  
605 allowed to incubate for 21 days.

606 **Histology:** For *RR5* expression, animals were sacrificed and transcardially perfused with 0.1M  
607 phosphate-buffered saline (PBS) then with 4% paraformaldehyde (PFA) in PBS. Brains were  
608 dissected out and drop fixed for two hours in 4% PFA before a PBS rinse and equilibration in 20%  
609 sucrose in PBS. Brains were sectioned into 30-40  $\mu$ m coronal sections and mounted on slides.  
610 Images were collected on a Zeiss confocal LSM780 microscope or Leica TCS SPE confocal  
611 microscope.

## 612 **Electrophysiology**

### 613 ***Slice preparation***

614 Slice preparation from the mouse LC follows an N-Methyl-D-glucamine (NMDG) slicing protocol  
615 (89,90). Briefly, animals were deeply anesthetized using 3% isoflurane. After decapitation, the  
616 brain was removed and placed into cold (0-4  $^{\circ}$ C) oxygenated NMDG solution containing 93 mM  
617 NMDG, 93 mM HCl, 2.5 mM KCl, 1.2 mM  $\text{NaH}_2\text{PO}_4$ , 30 mM  $\text{NaHCO}_3$ , 20 mM HEPES, 25 mM

618 glucose, 5 mM sodium ascorbate, 2 mM Thiourea, 3 mM sodium pyruvate, 10mM MgSO<sub>4</sub> and 0.5  
619 mM CaCl<sub>2</sub>, pH 7.35 (all from SIGMA-ALDRICH). Horizontal slices were prepared using a  
620 vibratome (200 μm thick) using zirconia blades. The brain slices were kept at 37.0 ± 0.5 °C in  
621 oxygenated NMDG solution for 10 minutes. They were then transferred to an artificial  
622 cerebrospinal fluid (ACSF) containing 125 mM NaCl, 2.5 mM KCl, 1.25 mM NaH<sub>2</sub>PO<sub>4</sub>, 25 mM  
623 NaHCO<sub>3</sub>, 1 mM MgCl<sub>2</sub>, 25 mM glucose, and 2 mM CaCl<sub>2</sub> (pH 7.4) for at least 1 hour prior to the  
624 beginning of recordings. During the recording sessions, the slices were submerged in a  
625 commercially available chamber (Luig Neumann, Order No. 200-100 500 0150-M) and were  
626 stabilized with a fine nylon net attached to a custom-designed platinum ring. This recording  
627 chamber was continuously perfused with oxygenated physiological solution throughout the  
628 recording session.

### 629 **Recordings**

630 Whole-cell recordings were performed as described previously (90–92). Briefly, patch pipettes (2-  
631 7 MΩ) were filled with an internal solution containing 120 mM potassium gluconate, 10 mM  
632 HEPES, 4 mM KCl, 4 mM MgATP, 0.3 mM Na<sub>3</sub>GTP, 10 mM sodium phosphocreatine and 0.5%  
633 biocytin (pH 7.25). Whole-cell recordings from up to 8 LC neurons were performed using two  
634 Quadro EPC 10 amplifiers (HEKA Electronic, Germany). PatchMaster (HEKA) and custom-written  
635 Matlab-based programs (Mathworks) were used to operate the recording system and perform  
636 online and offline data analysis. In current-clamp recordings, neurons were first current clamped  
637 at ~-40pA to prevent spontaneous firing. Prior to investigating the effect of drugs, we calculated  
638 spike thresholds and recorded firing patterns in response to sustained depolarizing currents by  
639 injecting increasing current steps (+10pA). Continuous recordings were obtained from LC neurons  
640 current clamped at -40 to 0 pA during drug wash-on experiments. We also calculated other  
641 intrinsic electrophysiological parameters, such as the input resistance, membrane time constant,  
642 spike amplitude, after-hyperpolarization (AHP) etc. (90–92).

## 643 **Plethysmography**

644 Plethysmography on conscious, unrestrained mice was carried out as described on 6-12 week  
645 old adult animals (52,88). Mice were subjected to a five-day habituation protocol with each day  
646 consisting of several minutes of handling, temperature taken by rectal probe, intraperitoneal saline  
647 injection, and 30 minutes in the plethysmography chamber. Mice were then tested within one  
648 week of the last day of conditioning.

649 On the day of testing, mice were taken from their home cage, weighed, and rectal temperature  
650 was taken. Animals were then placed into an airtight, temperature controlled ( $\sim 32^{\circ}\text{C}$ )  
651 plethysmography chamber and allowed to acclimate for at least 20 minutes in room air (21%  
652  $\text{O}_2/79\% \text{N}_2$ ) conditions. After acclimation and measurement under room air, the chamber gas was  
653 switched to a hypercapnic mixture of 5%  $\text{CO}_2/21\% \text{O}_2/74\% \text{N}_2$  for 20 minutes. Chamber gas was  
654 then switched back to room air for 20 minutes. The mice were briefly removed for rectal  
655 temperature measurement and intra-peritoneal injection of clozapine-N-oxide (CNO, National  
656 Institute of Mental Health Chemical Synthesis and Drug Supply Program) dissolved in saline (0.1  
657 mg/mL) for an effective concentration 1 mg/kg. The animal was returned to the chamber for  
658 another 20 minutes of room air, 20 minutes of hypercapnia, and 20 minutes of room air. The  
659 animal was then removed from the chamber and rectal temperature was taken immediately  
660 afterwards and again 30 minutes after the termination of the experiment. The animal was placed  
661 in its own cage during these 30 minutes at the ambient room temperature ( $\sim 23^{\circ}\text{C}$ ).

## 662 ***Plethysmography data collection and analysis***

663 Plethysmography pressure changes were measured using a Validyne DP45 differential pressure  
664 transducer and CD15 carrier demodulator in comparison to a reference chamber and recorded  
665 with LabChartPro in real time. Waveforms were analyzed offline using LabChart Pro and custom  
666 written MATLAB code (Supplemental Figure 3) to determine respiratory rate ( $V_f$ ), tidal volume ( $V_T$ )

667 (52), minute ventilation ( $\dot{V}_E$ ), oxygen consumption ( $\dot{V}_{O_2}$ ), ventilatory equivalents for oxygen  
668 ( $\dot{V}_E/\dot{V}_{O_2}$ ), and pattern analysis. Respiratory waveforms were collected offline during periods when  
669 the animal was at rest and readings were free from movement artifacts. A minimum of 1-minute  
670 cumulative data compiled from traces at least 10 seconds long from the last 10 minutes of a given  
671 experimental condition were analyzed.  $O_2$  consumption was determined by comparing the gas  
672 composition between calibration in an empty chamber and live breathing using an AEI oxygen  
673 sensor and analyzer. Chamber temperature was constantly monitored and recorded using a  
674 ThermoWorks MicroThermo 2 with probe and was recorded with LabChartPro in real time.

### 675 ***Plethysmography statistics***

676 Results ( $V_t$ ,  $V_T$ ,  $\dot{V}_E$ ,  $\dot{V}_{O_2}$ ,  $\dot{V}_E/\dot{V}_{O_2}$ ) for room air and hypercapnic data were compared between all  
677 cohorts using a linear mixed-effects regression model with animal type (experimental or control)  
678 and CNO administration (pre- or post-injection) as fixed effects and animal ID as a random effect.  
679 Temperature data was compared using a linear mixed-effects regression model with animal type  
680 (experimental or control) as a fixed effect. Residuals were independent and identically distributed  
681 as a normal distribution, which matches our model assumptions (Supplemental Figures 4-7). The  
682 residual plot for ventilatory equivalents of oxygen in room air for hM4D (Fig. 8) shows a slightly  
683 different distribution pattern (Supplemental Figure 5). However, this is because the random effect  
684 coefficients are unusually small. This data still follows the normal and independent residuals  
685 assumption. Random effect coefficient distribution is not as easily assessed with so few  
686 datapoints and is not critical to statistical outcome if violated (93). The p-values reported  
687 correspond to statistical significance of the conditional interaction between animal type and CNO  
688 administration. A p-value of  $<0.05$  was used to indicate statistical significance and standard error  
689 of the mean is shown on all charts.

### 690 **Imaging of Twitch 2 in mouse preovulatory follicles**



691 Preovulatory follicles were isolated and imaged as previously described (94). Briefly, antral  
692 follicles were dissected from 23- to 26-d-old *RR8; Bact\_Cre* mice. Follicles were cultured for 24–  
693 30 h on organotypic membranes (Millipore; cat. No. PICMORG50) in the presence of follicle-  
694 stimulating hormone. The follicle was held in a perfusion slide consisting of a plastic slide (ibidi)  
695 and a glass coverslip and assembled using silicon grease. The slide was constructed such that  
696 medium containing ovine LH (National Hormone and Peptide Program; 10 µg/mL) could be  
697 perfused through a 200-µm-deep channel holding the follicle. Temperature was maintained at  
698 30–34 °C, by use of a warm air blower (Nevtek). Preovulatory Follicles were imaged using a Zeiss  
699 Pascal confocal microscope with a 40X/1.2 NA objective. Images were collected every 10  
700 seconds. Measurements were corrected for autofluorescence and for spectral bleed-through of  
701 CFP into the YFP channel. Ratios were calculated by dividing the mean CFP intensity in each  
702 region of interest by the mean YFP intensity. Data analysis was done using ImageJ and Excel  
703 software. Data is representative of 4 follicles.

704 **Declarations**

705 **Ethics approval and consent to participate**

706 All experiments reported herein were conducted with explicit approval of and oversight by both  
707 Baylor College of Medicine Institutional Animal Care and Use Committee (IACUC) and University  
708 of Connecticut IACUC and abide by all state and national regulations regarding animal research  
709 for each work site.

710 **Consent for publication**

711 Not applicable.

712 **Availability of data and materials**

713 All datasets, animals, and materials generated and/ or used in this study are publicly available  
714 (Addgene and Mutant Mouse Resource and Research Centers Supported by NIH (MMRRC)) or  
715 available from the corresponding author on reasonable request.

716 **Competing interests**

717 The authors declare no competing interests.

718 **Funding**

719 R01: H1130249 (RR)

720 R21: OD025327 (RR)

721 R37: HD014939 (JRE and Laurinda A. Jaffe)

722 **Authors' contributions**

723 SJL completed experiments, analyzed data, and prepared the manuscript.

724 AM completed experiments, analyzed data, and prepared the manuscript.

725 PJH completed experiments, analyzed data, and prepared the manuscript.

726 PGF completed experiments, analyzed data and prepared the manuscript.

727 JP completed experiments, analyzed data, and prepared the manuscript.

728 AC completed statistical analyses and interpretations and prepared the manuscript.

729 JJS completed experiments, analyzed data, and prepared the manuscript.  
730 VKM assisted in the completion of experiments.  
731 PJZ completed experiments, analyzed data and prepared the manuscript  
732 JRE completed experiments, analyzed data, and prepared the manuscript.  
733 GA statistical analyses and interpretations and prepared the manuscript.  
734 XJ completed experiments, analyzed data, and prepared the manuscript.  
735 BRA completed experiments, analyzed data, and prepared the manuscript.  
736 AST completed experiments, analyzed data and prepared the manuscript  
737 M C-M assisted with experimental design and prepared the manuscript  
738 RR conceptualized the study, performed experiments, analyzed data, and prepared the  
739 manuscript.  
740 All authors read and approved the final manuscript.

#### 741 **Acknowledgements**

742 We thank M. Xue for providing the Cre and FLPo AAV viruses used in the dentate gyrus injection  
743 and Ronda Kram for technical assistance with cloning, mouse husbandry, and maintenance. We  
744 thank J. Dougherty, E. Schuman, J. Wess, B. Roth, and S. Sternson for providing plasmid  
745 templates for the EGFP-L10A, MetRS, G<sub>s</sub>-D, hM4D and hM3D, and PSAM cDNA, respectively.  
746 We thank Laurinda A. Jaffe for collaborating with us and author JRE with the Twitch studies. The  
747 Baylor College of Medicine Embryonic Stem (ES) Cell Core performed the ES cell  
748 electroporations and were exceptionally helpful in our experiments and the Baylor College of  
749 Medicine Genetically Engineered Mouse (GEM) Core performed the blastocyst injections.  
750 Imaging was carried out at the Baylor College of Medicine Optical Imaging and Vital Microscopy  
751 Core.

752 **Table 1. Publicly available modular targeting vectors for rapid generation of recombinase-**  
753 **responsive ES cells and mouse lines.**

754 **Table 2. *Rosa26* knock-in alleles generated with or without CRISPR/Cas9 methods.** Shown  
755 are targeted *Rosa26* alleles, function, length of cassette, current status, and expected MGI name  
756 (to be determined) in grey rows.

757 **Table 3. Targeting efficiencies for a multiplexed five cassette ES cell electroporation for**  
758 **the *Rosa26* locus.**

759 **Figure 1. Generation of intersectional *Rosa26* mouse lines.** **A)** Targeting schematic showing  
760 the modular targeting vector containing a 1kb 5' homology arm, *CAG* promoter, *FRT*-flanked  
761 neomycin and stop cassette, *LoxP*-flanked (optional) subtractive gene of interest (GOI-S) and  
762 stop cassette, intersectional gene of interest (GOI-I), *WPRE*, *bgh poly A* element, and 1.2kb 3'  
763 homology arm. The full intersectional cassette was knocked into the *Rosa26* locus, with a 22 bp  
764 deletion of the CRISPR sgRNA. **B)** PCR genotyping of neomycin selected ES cell clones.  
765 Targeting knock-in was determined using PCR primers that spanned from outside the *Rosa26*  
766 homology arms to either the *CAG* promoter (5' end) or *WPRE* (3' end). Amplification of a band  
767 indicates targeting. Shown are results from a targeting event with over 60% targeting efficiency  
768 (*RR7*). **C)** Four conditions with different Cas9:targeting vector ratios were used in our initial study:  
769 a 0:1 with no Cas9, 0.5:1, 1:1, and 10:1 **D)** Targeting efficiency results from the different ratios.  
770 The 10:1 Cas9:targeting vector ratio showed a 5-10 fold increase over an electroporation with no  
771 Cas9. Shown in red are results from previous electroporations using the traditional *Rosa26*  
772 targeting vector with more commonly used longer homology arms.

773 **Figure 2. Analysis of *Rosa26* sgRNA off-target sites.** No mutations were seen in the top 5  
774 potential off-target sites. **A)** List of top 10 potential off-target sites as determined by the Optimized  
775 CRISPR tool, base pair mismatches, and location in the genome. **B-F)** Sequence chromatograms  
776 of each off-target site, showing the correct sequence for each of the 3 selected clones that were  
777 injected into blastocysts as compared to the wildtype sequence.



778 **Figure 3. Germline Cre/FLP expression in RR5 adult mice to fluorescently label three**  
779 **cellular compartments in targeted cells. A-H)** *RR5* mice bred to *DBH<sup>p2aFLP</sup>; Bactin-Cre* mice  
780 express Cre ubiquitously and FLP in all noradrenergic (NA) neurons, thus marking only NA  
781 neurons, including the locus coeruleus (**A-D**) and A5 nucleus (**E-H**). **I-P)** *RR5* mice bred to  
782 *Vgat\_Cre; Vglut2-FLPo* mice with dual recombinase expression imaged in the entopeduncular  
783 nucleus (**I-L**) and lateral habenula (**M-P**). In targeted cells that express both Cre and FLP, cell  
784 nuclei are labeled with TagBFP, cell soma and processes are labeled with sfGFP, and pre-  
785 synaptic contacts are labeled with tdTomato.

786 **Figure 4. Viral-mediated expression of Cre or FLP recombinase in *RR5* adult mice to**  
787 **simultaneously, fluorescently label three cellular components. *RR5* mice injected with**  
788 **equal titers of AAV-Cre and AAV-FLP viruses into the dentate gyrus (A-H), basolateral**  
789 **amygdala (I-P), and olfactory bulb (Q-T).**

790 **Figure 5. Retrograde-viral Cre and germline FLP mediated expression of dual**  
791 **recombinases for tricistronic FP expression on RR5 background. A) RR5; DBH<sup>ip2aFLPo</sup> mice**  
792 were injected with CAV2-Cre virus into the basolateral amygdala. All *DBH* noradrenergic neurons  
793 express FLP, but only those noradrenergic neurons projecting to the injected amygdala will also  
794 express Cre. Marked double Cre/FLP positive cells will express H2B-TagBFP highlighting the  
795 nucleus in blue, sfGFP filling the cell including the axon, and synaptophysin-tdTomato labeling  
796 presynaptic contacts. BLA: Basolateral amygdala. DG: Dentate gyrus. DR: Dorsal raphé. LC:  
797 Locus coeruleus. OB: Olfactory bulb. RtTg: Reticulotegmental pontine nucleus. *DBH* positive  
798 neurons that project to the amygdala arise primarily from the ipsilateral locus coeruleus (**B-E**) with  
799 some sparse labeling in the contralateral locus coeruleus (**F-I**). Red puncta overlapping with green  
800 but lacking blue marked nuclei (indicative of projections from the marked population) can be seen  
801 in a variety of mid- and forebrain areas, including the injected amygdala (**J-M**), the raphé nucleus  
802 (**N-Q**), reticulotegmental pontine nuclei (**R-U**), dentate gyrus (**V-Y**), and olfactory bulb (**Z-CC**).

803 **Figure 6. Retrograde-viral FLP and germline Cre mediated expression of dual**  
804 **recombinases for tricistronic FP expression on RR5 background. A)** *RR5; Vglut2<sup>Cre</sup>* mice  
805 were injected with retro-AAV-Ef1a-FLPo virus into the lateral hypothalamus. All *Vglut2* neurons  
806 express Cre, but only those *Vglut2* neurons projecting to the injected LHA will also express FLP.  
807 Marked double Cre/FLP positive cells will express H2B-TagBFP highlighting the nucleus in blue,  
808 sfGFP filling the cell including the axon, and synaptophysin-tdTomato labeling presynaptic  
809 contacts. LHA: Lateral hypothalamic area. *Vglut2* positive neurons that project to the LHA arise  
810 from the cingulate gyrus (**B-E**), piriform cortex (**F-I**), and medial habenula (**J-M**).

811 **Figure 7. Electrophysiological characterization of CNO-DREADD mediated responses in**  
812 **noradrenergic locus coeruleus (LC) neurons from lines *RR1(P)*, *RR2(P)*, and *RC::FPDi (P)*.**  
813 **(A)** Representative wash-on responses of LC neurons from *RR1(P)* ( $n=19$   
814 *neurons*), *RR2(P)* ( $n=10$  *neurons*), and *RC::FPDi(P)* ( $n=10$  *neurons*) lines in response to  
815 DREADD agonist CNO. **(B)** Membrane potentials of each LC neurons (pre-CNO vs post-CNO  
816 values). **(C)** Summary plots of absolute voltage change for each DREADD line tested following  
817 CNO treatment. (\* $p<0.05$ ; \*\* $p<0.01$ ).

818 **Figure 8. CNO-hM4D mediated perturbation of noradrenergic *DBH-Cre* neurons results in**  
819 **a reduced hypercapnic response. A)** Representative breathing traces from a *DBH-Cre; RR1P*  
820 animal before and after CNO administration under hypercapnic conditions  
821 (5%CO<sub>2</sub>/21%O<sub>2</sub>/74%N<sub>2</sub>). **B-F)** Quantification of respiratory and metabolic parameters under room  
822 air and hypercapnic conditions in *DBH-Cre; RR1P* animals and sibling controls. Measured values  
823 include respiratory rate (**B**), tidal volume (**C**), minute ventilation (**D**), oxygen consumption (**E**), and  
824 minute ventilation normalized to oxygen consumption (**G**). No difference was seen under room air  
825 conditions but *DBH-Cre; RR1P* animals showed a deficit in volume, minute ventilation, and minute  
826 ventilation normalized to oxygen consumption under hypercapnic conditions. **G)** No difference in  
827 temperature was seen between *DBH-Cre; RR1P* animals and sibling controls. \*p<0.05; \*\*p<0.01;  
828 \*\*\*p<0.001.

829 **Figure 9. CNO-hM3D mediated perturbation of noradrenergic *DBH-Cre* neurons results in**  
830 **enhanced room air ventilation and a reduced hypercapnic response. A)** Representative  
831 breathing traces from a *DBH-Cre; RR2P* animal before and after CNO administration under  
832 room air conditions (21%O<sub>2</sub>/79%N<sub>2</sub>). **B)** Representative breathing traces from a *DBH-Cre;*  
833 *RR2P* animal before and after CNO administration under hypercapnic conditions  
834 (5%CO<sub>2</sub>/21%O<sub>2</sub>/74%N<sub>2</sub>). **C-G)** Quantification of respiratory and metabolic parameters under  
835 room air and hypercapnic conditions in *DBH-Cre; RR2P* animals and sibling controls. Measured  
836 values include respiratory rate (**C**), tidal volume (**D**), minute ventilation (**E**), oxygen consumption  
837 (**F**), and minute ventilation normalized to oxygen consumption (**G**). After CNO administration,  
838 *DBH-Cre; RR2P* animals showed increased rate, volume, minute ventilation, and oxygen  
839 consumption under room air conditions. Under hypercapnic conditions, *DBH-Cre; RR2P* animals  
840 showed increased oxygen consumption resulting in a reduced minute ventilation to oxygen  
841 consumption value. **I)** *DBH-Cre; RR2P* animals showed a significant deficit in temperature 30  
842 minutes after the end of the assay. \*p<0.05; \*\*p<0.01; \*\*\*p<0.001.

843 **Figure 10. Expression and function of Twitch-2B in the granulosa cells of mouse ovarian**  
844 **follicles. (A)** A follicle from a mouse expressing Twitch-2B (homozygote). A follicle consists of  
845 multiple layers of granulosa cells surrounding an oocyte in the center. Twitch-2B is uniformly  
846 expressed in the granulosa cells but is not detectable in the oocyte. A layer of theca cells,  
847 adhering to the outside of the follicle, expresses Twitch-2B at a higher level. Scale bar = 50  $\mu\text{m}$ .  
848 **(B)** ~6-fold increase in YFP/CFP ratio in the outer granulosa cells after application of 10  $\mu\text{M}$   
849 ionomycin in the presence of 10 mM  $\text{CaCl}_2$ . Representative of 4 follicles.



850 **Supplemental Figure 1. Genetic schema for animals used to gather data for Figures 3-4.**

851 **Supplemental Figure 2. Genetic schema for animals used in Figures 7-9.**

852 **Supplemental Figure 3. Custom MatLab code for plethysmography data analysis.**

853 **Supplemental Table 4. QQplots for normal distribution testing of residuals from**  
854 **plethysmography analyses from Fig. 8.**

855 **Supplemental Table 5. Residual plots for independence testing of residuals from**  
856 **plethysmography analyses from Fig. 8.**

857 **Supplemental Table 6. QQplots for normal distribution testing of residuals from**  
858 **plethysmography analyses from Fig. 9.**

859 **Supplemental Table 7. Residual plots for independence testing of residuals from**  
860 **plethysmography analyses from Fig. 9.**

861 **REFERENCES**

- 862 1. Armbruster BN, Li X, Pausch MH, Herlitz S, Roth BL. Evolving the lock to fit the key to create a  
863 family of G protein-coupled receptors potently activated by an inert ligand. *Proc Natl Acad Sci*  
864 *USA*. 2007 Mar 20;104(12):5163–8.
- 865 2. Sauer B. Manipulation of transgenes by site-specific recombination: Use of Cre recombinase. *Guide*  
866 *to techniques in mouse development*. Elsevier; 1993. p. 890–900.
- 867 3. Chuong AS, Miri ML, Busskamp V, Matthews GAC, Acker LC, Sørensen AT, et al. Noninvasive  
868 optical inhibition with a red-shifted microbial rhodopsin. *Nat Neurosci*. 2014 Aug;17(8):1123–9.
- 869 4. Rowitch DH, S-Jacques B, Lee SM, Flax JD, Snyder EY, McMahon AP. Sonic hedgehog regulates  
870 proliferation and inhibits differentiation of CNS precursor cells. *J Neurosci*. 1999 Oct  
871 15;19(20):8954–65.
- 872 5. Urlinger S, Baron U, Thellmann M, Hasan MT, Bujard H, Hillen W. Exploring the sequence space  
873 for tetracycline-dependent transcriptional activators: novel mutations yield expanded range and  
874 sensitivity. *Proc Natl Acad Sci USA*. 2000 Jul 5;97(14):7963–8.
- 875 6. Sander JD, Joung JK. CRISPR-Cas systems for editing, regulating and targeting genomes. *Nat*  
876 *Biotechnol*. 2014 Apr;32(4):347–55.
- 877 7. Platt RJ, Chen S, Zhou Y, Yim MJ, Swiech L, Kempton HR, et al. CRISPR-Cas9 knockin mice for  
878 genome editing and cancer modeling. *Cell*. 2014 Oct 9;159(2):440–55.
- 879 8. Dubreuil V, Ramanantsoa N, Trochet D, Vaubourg V, Amiel J, Gallego J, et al. A human mutation  
880 in *Phox2b* causes lack of CO<sub>2</sub> chemosensitivity, fatal central apnea, and specific loss of parafacial  
881 neurons. *Proc Natl Acad Sci USA*. 2008 Jan 22;105(3):1067–72.
- 882 9. Zucker SN, Bancroft TA, Place DE, Des Soye B, Bagati A, Berezney R. A dominant negative Cx43  
883 mutant differentially affects tumorigenic and invasive properties in human metastatic melanoma  
884 cells. *J Cell Physiol*. 2013 Apr;228(4):853–9.
- 885 10. LeMaster AM, Krimm RF, Davis BM, Noel T, Forbes ME, Johnson JE, et al. Overexpression of  
886 brain-derived neurotrophic factor enhances sensory innervation and selectively increases neuron  
887 number. *J Neurosci*. 1999 Jul 15;19(14):5919–31.
- 888 11. Collins AL, Levenson JM, Vilaythong AP, Richman R, Armstrong DL, Noebels JL, et al. Mild  
889 overexpression of MeCP2 causes a progressive neurological disorder in mice. *Hum Mol Genet*.  
890 2004 Nov 1;13(21):2679–89.
- 891 12. Ellis T, Smyth I, Riley E, Bowles J, Adolphe C, Rothnagel JA, et al. Overexpression of Sonic  
892 Hedgehog suppresses embryonic hair follicle morphogenesis. *Dev Biol*. 2003 Nov 15;263(2):203–  
893 15.
- 894 13. Ngo JT, Champion JA, Mahdavi A, Tanrikulu IC, Beatty KE, Connor RE, et al. Cell-selective  
895 metabolic labeling of proteins. *Nat Chem Biol*. 2009 Oct;5(10):715–7.
- 896 14. Doyle JP, Dougherty JD, Heiman M, Schmidt EF, Stevens TR, Ma G, et al. Application of a  
897 translational profiling approach for the comparative analysis of CNS cell types. *Cell*. 2008 Nov  
898 14;135(4):749–62.
- 899 15. Marvin JS, Borghuis BG, Tian L, Cichon J, Harnett MT, Akerboom J, et al. An optimized  
900 fluorescent probe for visualizing glutamate neurotransmission. *Nat Methods*. 2013 Feb;10(2):162–  
901 70.
- 902 16. Akemann W, Mutoh H, Perron A, Park YK, Iwamoto Y, Knöpfel T. Imaging neural circuit  
903 dynamics with a voltage-sensitive fluorescent protein. *J Neurophysiol*. 2012 Oct;108(8):2323–37.
- 904 17. Lin C-W, Sim S, Ainsworth A, Okada M, Kelsch W, Lois C. Genetically increased cell-intrinsic  
905 excitability enhances neuronal integration into adult brain circuits. *Neuron*. 2010 Jan 14;65(1):32–  
906 9.
- 907 18. Johns DC, Marx R, Mains RE, O'Rourke B, Marbán E. Inducible genetic suppression of neuronal  
908 excitability. *J Neurosci*. 1999 Mar 1;19(5):1691–7.
- 909 19. Ibañez-Tallón I, Wen H, Miwa JM, Xing J, Tekinay AB, Ono F, et al. Tethering naturally occurring  
910 peptide toxins for cell-autonomous modulation of ion channels and receptors in vivo. *Neuron*. 2004  
911 Aug 5;43(3):305–11.



- 912 20. Duan B, Cheng L, Bourane S, Britz O, Padilla C, Garcia-Campmany L, et al. Identification of  
913 spinal circuits transmitting and gating mechanical pain. *Cell*. 2014 Dec 4;159(6):1417–32.
- 914 21. Kim JC, Cook MN, Carey MR, Shen C, Regehr WG, Dymecki SM. Linking genetically defined  
915 neurons to behavior through a broadly applicable silencing allele. *Neuron*. 2009 Aug 13;63(3):305–  
916 15.
- 917 22. Conklin BR, Hsiao EC, Claeysen S, Dumuis A, Srinivasan S, Forsayeth JR, et al. Engineering  
918 GPCR signaling pathways with RASSLs. *Nat Methods*. 2008 Aug;5(8):673–8.
- 919 23. Beier KT, Samson MES, Matsuda T, Cepko CL. Conditional expression of the TVA receptor  
920 allows clonal analysis of descendants from Cre-expressing progenitor cells. *Dev Biol*. 2011 May  
921 15;353(2):309–20.
- 922 24. Magnus CJ, Lee PH, Atasoy D, Su HH, Looger LL, Sternson SM. Chemical and genetic  
923 engineering of selective ion channel-ligand interactions. *Science*. 2011 Sep 2;333(6047):1292–6.
- 924 25. Vardy E, Robinson JE, Li C, Olsen RHJ, DiBerto JF, Giguere PM, et al. A new DREADD  
925 facilitates the multiplexed chemogenetic interrogation of behavior. *Neuron*. 2015 May  
926 20;86(4):936–46.
- 927 26. Zhao R, Grunke SD, Keralapurath MM, Yetman MJ, Lam A, Lee T-C, et al. Impaired Recall of  
928 Positional Memory following Chemogenetic Disruption of Place Field Stability. *Cell Rep*. 2016 Jul  
929 19;16(3):793–804.
- 930 27. Beier KT, Saunders A, Oldenburg IA, Miyamichi K, Akhtar N, Luo L, et al. Anterograde or  
931 retrograde transsynaptic labeling of CNS neurons with vesicular stomatitis virus vectors. *Proc Natl  
932 Acad Sci USA*. 2011 Sep 13;108(37):15414–9.
- 933 28. Wickersham IR, Finke S, Conzelmann K-K, Callaway EM. Retrograde neuronal tracing with a  
934 deletion-mutant rabies virus. *Nat Methods*. 2007 Jan;4(1):47–9.
- 935 29. Zeisel A, Muñoz-Manchado AB, Codeluppi S, Lönnerberg P, La Manno G, Juréus A, et al. Brain  
936 structure. Cell types in the mouse cortex and hippocampus revealed by single-cell RNA-seq.  
937 *Science*. 2015 Mar 6;347(6226):1138–42.
- 938 30. Fuzik J, Zeisel A, Máté Z, Calvigioni D, Yanagawa Y, Szabó G, et al. Integration of  
939 electrophysiological recordings with single-cell RNA-seq data identifies neuronal subtypes. *Nat  
940 Biotechnol*. 2016 Feb;34(2):175–83.
- 941 31. Cadwell CR, Palasantza A, Jiang X, Berens P, Deng Q, Yilmaz M, et al. Electrophysiological,  
942 transcriptomic and morphologic profiling of single neurons using Patch-seq. *Nat Biotechnol*. 2016  
943 Feb;34(2):199–203.
- 944 32. Awatramani R, Soriano P, Rodriguez C, Mai JJ, Dymecki SM. Cryptic boundaries in roof plate and  
945 choroid plexus identified by intersectional gene activation. *Nat Genet*. 2003 Sep;35(1):70–5.
- 946 33. Han X, Zhang Z, He L, Zhu H, Li Y, Pu W, et al. A suite of new Dre recombinase drivers markedly  
947 expands the ability to perform intersectional genetic targeting. *Cell Stem Cell*. 2021 Jun  
948 3;28(6):1160–1176.e7.
- 949 34. Hirsch M-R, d’Aurèaux F, Dymecki SM, Brunet J-F, Goridis C. A Phox2b::FLPo transgenic  
950 mouse line suitable for intersectional genetics. *Genesis*. 2013 Jul;51(7):506–14.
- 951 35. Dymecki SM, Ray RS, Kim JC. Mapping Cell Fate and Function Using Recombinase-Based  
952 Intersectional Strategies. *Guide to Techniques in Mouse Development, Part B: Mouse Molecular  
953 Genetics, 2nd Edition*. Elsevier; 2010. p. 183–213.
- 954 36. Robertson SD, Plummer NW, de Marchena J, Jensen P. Developmental origins of central  
955 norepinephrine neuron diversity. *Nat Neurosci*. 2013 Aug;16(8):1016–23.
- 956 37. Brust RD, Corcoran AE, Richerson GB, Nattie E, Dymecki SM. Functional and developmental  
957 identification of a molecular subtype of brain serotonergic neuron specialized to regulate breathing  
958 dynamics. *Cell Rep*. 2014 Dec 24;9(6):2152–65.
- 959 38. Niederkofler V, Asher TE, Okaty BW, Rood BD, Narayan A, Hwa LS, et al. Identification of  
960 Serotonergic Neuronal Modules that Affect Aggressive Behavior. *Cell Rep*. 2016 Nov  
961 15;17(8):1934–49.
- 962 39. Ruffault P-L, D’Aurèaux F, Hayes JA, Nomaksteinsky M, Autran S, Fujiyama T, et al. The

- 963 retrotrapezoid nucleus neurons expressing *Atoh1* and *Phox2b* are essential for the respiratory  
964 response to CO<sub>2</sub>. *Elife*. 2015 Apr 13;4.
- 965 40. He M, Tucciarone J, Lee S, Nigro MJ, Kim Y, Levine JM, et al. Strategies and tools for  
966 combinatorial targeting of gabaergic neurons in mouse cerebral cortex. *Neuron*. 2016 Sep  
967 21;91(6):1228–43.
- 968 41. Madisen L, Garner AR, Shimaoka D, Chuong AS, Klapoetke NC, Li L, et al. Transgenic mice for  
969 intersectional targeting of neural sensors and effectors with high specificity and performance.  
970 *Neuron*. 2015 Mar 4;85(5):942–58.
- 971 42. Chen Y-W, Das M, Oyarzabal EA, Cheng Q, Plummer NW, Smith KG, et al. Genetic identification  
972 of a population of noradrenergic neurons implicated in attenuation of stress-related responses. *Mol*  
973 *Psychiatry*. 2019;24(5):710–25.
- 974 43. Tervo DGR, Hwang B-Y, Viswanathan S, Gaj T, Lavzin M, Ritola KD, et al. A designer AAV  
975 variant permits efficient retrograde access to projection neurons. *Neuron*. 2016 Oct 19;92(2):372–  
976 82.
- 977 44. Zingg B, Chou X-L, Zhang Z-G, Mesik L, Liang F, Tao HW, et al. AAV-Mediated Anterograde  
978 Transsynaptic Tagging: Mapping Corticocollicular Input-Defined Neural Pathways for Defense  
979 Behaviors. *Neuron*. 2017 Jan 4;93(1):33–47.
- 980 45. Kawano F, Okazaki R, Yazawa M, Sato M. A photoactivatable Cre-loxP recombination system for  
981 optogenetic genome engineering. *Nat Chem Biol*. 2016 Dec;12(12):1059–64.
- 982 46. Tang JCY, Rudolph S, Dhande OS, Abaira VE, Choi S, Lapan SW, et al. Cell type-specific  
983 manipulation with GFP-dependent Cre recombinase. *Nat Neurosci*. 2015 Sep;18(9):1334–41.
- 984 47. DeNardo LA, Liu CD, Allen WE, Adams EL, Friedmann D, Fu L, et al. Temporal evolution of  
985 cortical ensembles promoting remote memory retrieval. *Nat Neurosci*. 2019 Jan 28;22(3):460–9.
- 986 48. Quadros RM, Miura H, Harms DW, Akatsuka H, Sato T, Aida T, et al. Easi-CRISPR: a robust  
987 method for one-step generation of mice carrying conditional and insertion alleles using long  
988 ssDNA donors and CRISPR ribonucleoproteins. *Genome Biol*. 2017 May 17;18(1):92.
- 989 49. Allen WE, Luo L. Intersectional illumination of neural circuit function. *Neuron*. 2015 Mar  
990 4;85(5):889–92.
- 991 50. Zambrowicz BP, Imamoto A, Fiering S, Herzenberg LA, Kerr WG, Soriano P. Disruption of  
992 overlapping transcripts in the ROSA beta geo 26 gene trap strain leads to widespread expression of  
993 beta-galactosidase in mouse embryos and hematopoietic cells. *Proc Natl Acad Sci USA*. 1997 Apr  
994 15;94(8):3789–94.
- 995 51. Soriano P. Generalized lacZ expression with the ROSA26 Cre reporter strain. *Nat Genet*. 1999  
996 Jan;21(1):70–1.
- 997 52. Ray RS, Corcoran AE, Brust RD, Kim JC, Richerson GB, Nattie E, et al. Impaired respiratory and  
998 body temperature control upon acute serotonergic neuron inhibition. *Science*. 2011 Jul  
999 29;333(6042):637–42.
- 1000 53. Cong L, Ran FA, Cox D, Lin S, Barretto R, Habib N, et al. Multiplex genome engineering using  
1001 CRISPR/Cas systems. *Science*. 2013 Feb 15;339(6121):819–23.
- 1002 54. Sun JJ, Ray R. Generation of Two Noradrenergic-Specific Dopamine-Beta-Hydroxylase-FLPo  
1003 Knock-In Mice Using CRISPR/Cas9-Mediated Targeting in Embryonic Stem Cells. *PLoS One*.  
1004 2016 Jul 21;11(7):e0159474.
- 1005 55. Thestrup T, Litzlbauer J, Bartholomäus I, Mues M, Russo L, Dana H, et al. Optimized ratiometric  
1006 calcium sensors for functional in vivo imaging of neurons and T lymphocytes. *Nat Methods*. 2014  
1007 Feb;11(2):175–82.
- 1008 56. Alexander GM, Rogan SC, Abbas AI, Armbruster BN, Pei Y, Allen JA, et al. Remote control of  
1009 neuronal activity in transgenic mice expressing evolved G protein-coupled receptors. *Neuron*. 2009  
1010 Jul 16;63(1):27–39.
- 1011 57. Guettier J-M, Gautam D, Scarselli M, Ruiz de Azua I, Li JH, Rosemond E, et al. A chemical-  
1012 genetic approach to study G protein regulation of beta cell function in vivo. *Proc Natl Acad Sci*  
1013 *USA*. 2009 Nov 10;106(45):19197–202.

- 1014 58. Heiman M, Kulicke R, Fenster RJ, Greengard P, Heintz N. Cell type-specific mRNA purification  
1015 by translating ribosome affinity purification (TRAP). *Nat Protoc.* 2014 May 8;9(6):1282–91.
- 1016 59. Li L, Tasic B, Micheva KD, Ivanov VM, Spletter ML, Smith SJ, et al. Visualizing the distribution  
1017 of synapses from individual neurons in the mouse brain. *PLoS One.* 2010 Jul 9;5(7):e11503.
- 1018 60. Root DH, Zhang S, Barker DJ, Miranda-Barrientos J, Liu B, Wang H-L, et al. Selective Brain  
1019 Distribution and Distinctive Synaptic Architecture of Dual Glutamatergic-GABAergic Neurons.  
1020 *Cell Rep.* 2018 Jun 19;23(12):3465–79.
- 1021 61. Shabel SJ, Proulx CD, Piriz J, Malinow R. Mood regulation. GABA/glutamate co-release controls  
1022 habenula output and is modified by antidepressant treatment. *Science.* 2014 Sep  
1023 19;345(6203):1494–8.
- 1024 62. Hnasko TS, Perez FA, Scouras AD, Stoll EA, Gale SD, Luquet S, et al. Cre recombinase-mediated  
1025 restoration of nigrostriatal dopamine in dopamine-deficient mice reverses hypophagia and  
1026 bradykinesia. *Proc Natl Acad Sci USA.* 2006 Jun 6;103(23):8858–63.
- 1027 63. Soudais C, Laplace-Builhe C, Kissa K, Kremer EJ. Preferential transduction of neurons by canine  
1028 adenovirus vectors and their efficient retrograde transport in vivo. *FASEB J.* 2001  
1029 Oct;15(12):2283–5.
- 1030 64. Plummer NW, Chandler DJ, Powell JM, Scappini EL, Waterhouse BD, Jensen P. An Intersectional  
1031 Viral-Genetic Method for Fluorescent Tracing of Axon Collaterals Reveals Details of  
1032 Noradrenergic Locus Coeruleus Structure. *Eneuro.* 2020 May 15;7(3).
- 1033 65. Rodríguez CI, Buchholz F, Galloway J, Sequerra R, Kasper J, Ayala R, et al. High-efficiency  
1034 deleter mice show that FLPe is an alternative to Cre-loxP. *Nat Genet.* 2000 Jun;25(2):139–40.
- 1035 66. Bang SJ, Jensen P, Dymecki SM, Commons KG. Projections and interconnections of genetically  
1036 defined serotonin neurons in mice. *Eur J Neurosci.* 2012 Jan;35(1):85–96.
- 1037 67. Egbert JR, Fahey PG, Reimer J, Owen CM, Evsikov AV, Nikolaev VO, et al. Follicle-stimulating  
1038 hormone and luteinizing hormone increase Ca<sup>2+</sup> in the granulosa cells of mouse ovarian follicles†.  
1039 *Biol Reprod.* 2019 May 14;
- 1040 68. Quadros RM, Miura H, Harms DW, Akatsuka H, Sato T, Aida T, et al. Easi-CRISPR: a robust  
1041 method for one-step generation of mice carrying conditional and insertion alleles using long  
1042 ssDNA donors and CRISPR ribonucleoproteins. *Genome Biol.* 2017 May 17;18(1):92.
- 1043 69. Wang B, Li K, Wang A, Reiser M, Saunders T, Lockey RF, et al. Highly efficient CRISPR/HDR-  
1044 mediated knock-in for mouse embryonic stem cells and zygotes. *BioTechniques.* 2015 Oct  
1045 1;59(4):201–2, 204, 206.
- 1046 70. Chu VT, Weber T, Graf R, Sommermann T, Petsch K, Sack U, et al. Efficient generation of Rosa26  
1047 knock-in mice using CRISPR/Cas9 in C57BL/6 zygotes. *BMC Biotechnol.* 2016 Jan 16;16:4.
- 1048 71. Yoshimi K, Kunihiro Y, Kaneko T, Nagahora H, Voigt B, Mashimo T. ssODN-mediated knock-in  
1049 with CRISPR-Cas for large genomic regions in zygotes. *Nat Commun.* 2016 Jan 20;7:10431.
- 1050 72. Jensen P, Farago AF, Awatramani RB, Scott MM, Deneris ES, Dymecki SM. Redefining the  
1051 serotonergic system by genetic lineage. *Nat Neurosci.* 2008 Apr;11(4):417–9.
- 1052 73. Bochkov YA, Palmenberg AC. Translational efficiency of EMCV IRES in bicistronic vectors is  
1053 dependent upon IRES sequence and gene location. *BioTechniques.* 2006 Sep;41(3):283–4, 286,  
1054 288 passim.
- 1055 74. Viemari J-C, Roux J-C, Tryba AK, Saywell V, Burnet H, Peña F, et al. Mecp2 deficiency disrupts  
1056 norepinephrine and respiratory systems in mice. *J Neurosci.* 2005 Dec 14;25(50):11521–30.
- 1057 75. Viemari J-C, Ramirez J-M. Norepinephrine differentially modulates different types of respiratory  
1058 pacemaker and nonpacemaker neurons. *J Neurophysiol.* 2006 Apr;95(4):2070–82.
- 1059 76. Li A, Emond L, Nattie E. Brainstem catecholaminergic neurons modulate both respiratory and  
1060 cardiovascular function. *Adv Exp Med Biol.* 2008;605:371–6.
- 1061 77. Biancardi V, Bicego KC, Almeida MC, Gargaglioni LH. Locus coeruleus noradrenergic neurons  
1062 and CO<sub>2</sub> drive to breathing. *Pflugers Arch.* 2008 Mar;455(6):1119–28.
- 1063 78. Viemari J-C. Noradrenergic modulation of the respiratory neural network. *Respir Physiol*  
1064 *Neurobiol.* 2008 Dec 10;164(1–2):123–30.

- 1065 79. Gargaglioni LH, Hartzler LK, Putnam RW. The locus coeruleus and central chemosensitivity.  
1066 *Respir Physiol Neurobiol.* 2010 Oct 31;173(3):264–73.
- 1067 80. Kuo F-S, Falquetto B, Chen D, Oliveira LM, Takakura AC, Mulkey DK. In vitro characterization  
1068 of noradrenergic modulation of chemosensitive neurons in the retrotrapezoid nucleus. *J*  
1069 *Neurophysiol.* 2016 Sep 1;116(3):1024–35.
- 1070 81. Engelbrecht AH, Russell V, Carstens ME, De Villiers AS, Searson A, Jaffer A, et al. Evidence that  
1071 noradrenergic neurons in the A1 and A2 nuclei are lesioned by low doses of 6-OHDA injected into  
1072 the locus coeruleus. *J Neurosci Methods.* 1994 Apr;52(1):57–60.
- 1073 82. Massey CA, Iceman KE, Johansen SL, Wu Y, Harris MB, Richerson GB. Isoflurane abolishes  
1074 spontaneous firing of serotonin neurons and masks their pH/CO<sub>2</sub> chemosensitivity. *J Neurophysiol.*  
1075 2015 Apr 1;113(7):2879–88.
- 1076 83. Cooper KE, Jones DL, Pittman QJ, Veale WL. The effect of noradrenaline, injected into the  
1077 hypothalamus, on thermoregulation in the cat. *J Physiol (Lond).* 1976 Sep;261(1):211–22.
- 1078 84. Handley SL, Spencer PS. thermoregulatory effects of intraventricular injection of noradrenaline in  
1079 the mouse and the influence of ambient temperature. *J Physiol (Lond).* 1972 Jun;223(3):619–31.
- 1080 85. Guyenet PG, Bayliss DA. Neural control of breathing and CO<sub>2</sub> homeostasis. *Neuron.* 2015 Sep  
1081 2;87(5):946–61.
- 1082 86. Ray RS, Corcoran AE, Brust RD, Soriano LP, Nattie EE, Dymecki SM. Egr2-neurons control the  
1083 adult respiratory response to hypercapnia. *Brain Res.* 2013 May 20;1511:115–25.
- 1084 87. Hennessy ML, Corcoran AE, Brust RD, Chang Y, Nattie EE, Dymecki SM. Activity of  
1085 Tachykinin1-Expressing Pet1 Raphe Neurons Modulates the Respiratory Chemoreflex. *J Neurosci.*  
1086 2017 Feb 15;37(7):1807–19.
- 1087 88. Martinez VK, Saldana-Morales F, Sun JJ, Zhu PJ, Costa-Mattioli M, Ray RS. Off-Target Effects of  
1088 Clozapine-N-Oxide on the Chemosensory Reflex Are Masked by High Stress Levels. *Front*  
1089 *Physiol.* 2019 May 22;10:521.
- 1090 89. Ting JT, Daigle TL, Chen Q, Feng G. Acute brain slice methods for adult and aging animals:  
1091 application of targeted patch clamp analysis and optogenetics. *Patch.*
- 1092 90. Jiang X, Shen S, Cadwell CR, Berens P, Sinz F, Ecker AS, et al. Principles of connectivity among  
1093 morphologically defined cell types in adult neocortex. *Science.* 2015 Nov 27;350(6264):aac9462.
- 1094 91. Scala F, Kobak D, Shan S, Bernaerts Y, Laturnus S, Cadwell CR, et al. Layer 4 of mouse neocortex  
1095 differs in cell types and circuit organization between sensory areas. *Nat Commun.* 2019 Sep  
1096 13;10(1):4174.
- 1097 92. Scala F, Kobak D, Bernabucci M, Bernaerts Y, Cadwell CR, Castro JR, et al. Phenotypic variation  
1098 of transcriptomic cell types in mouse motor cortex. *Nature.* 2020 Nov 12;
- 1099 93. Schielzeth H, Dingemanse NJ, Nakagawa S, Westneat DF, Allogue H, Teplitsky C, et al.  
1100 Robustness of linear mixed-effects models to violations of distributional assumptions. *Methods*  
1101 *Ecol Evol.* 2020 Jun 12;
- 1102 94. Shuhaibar LC, Egbert JR, Norris RP, Lampe PD, Nikolaev VO, Thunemann M, et al. Intercellular  
1103 signaling via cyclic GMP diffusion through gap junctions restarts meiosis in mouse ovarian  
1104 follicles. *Proc Natl Acad Sci USA.* 2015 Apr 28;112(17):5527–32.
- 1105

# Figure 1

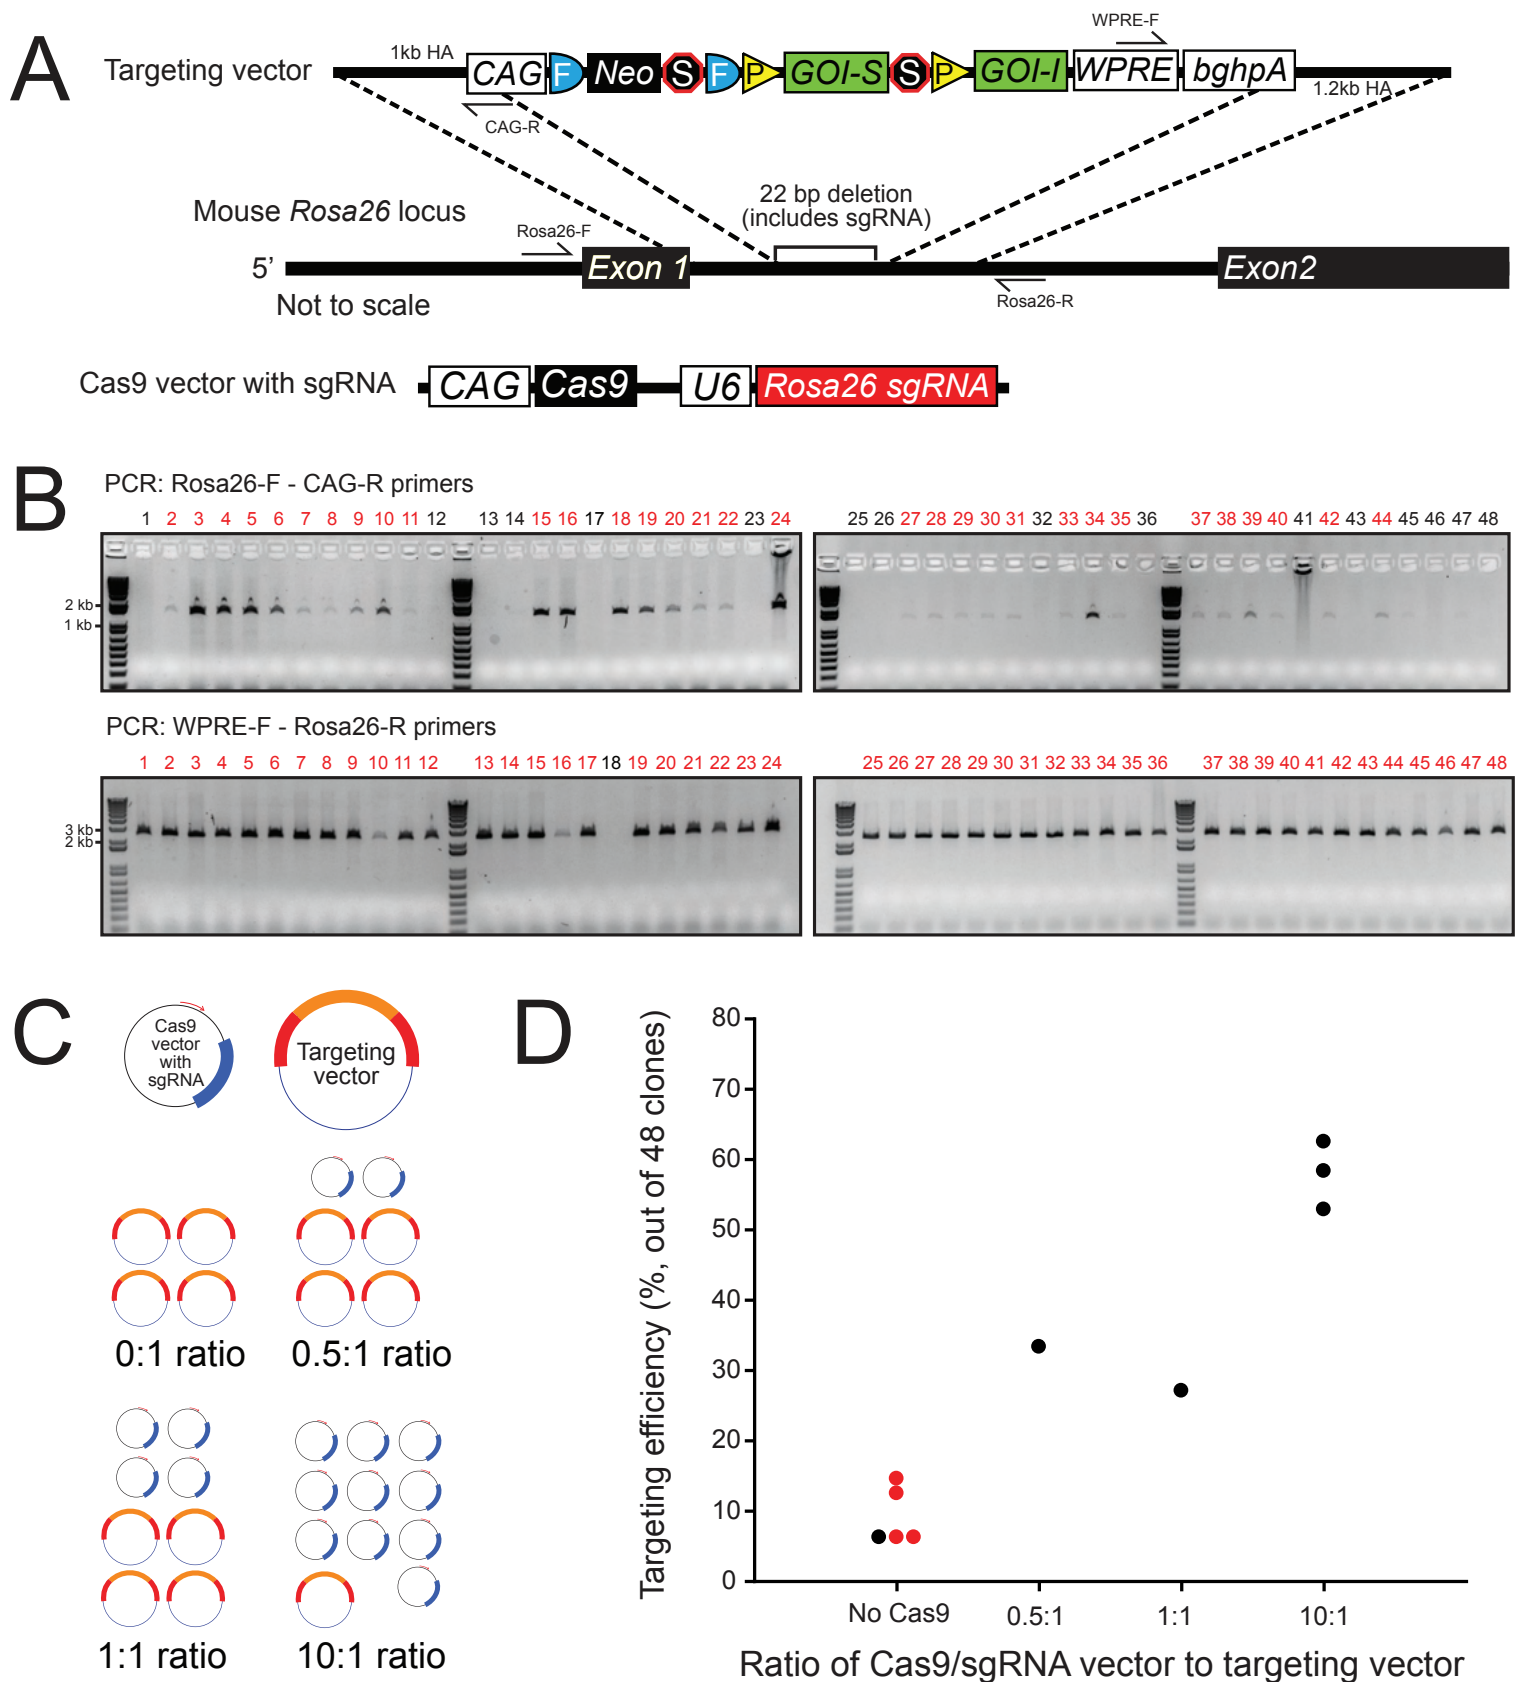



# Figure 2

**A**

| Sequence                    | Score | Mut | Locus            |
|-----------------------------|-------|-----|------------------|
| Off1: .T.T.....T.....A. CA. | 1.1   | 3MM | chr15:-9941110   |
| ACTGGAGTTGCAGATCACGA GGG    |       |     |                  |
| Off2: C...TG...T.....T..    | 0.8   | 4MM | chr14:-25087434  |
| Off3: C.....C.TG.....TA.    | 0.7   | 4MM | chr9:+122854629  |
| Off4: .T.A...TT.....A.      | 0.7   | 4MM | chr6:-97126315   |
| Off5: TA..C.....T AA.       | 0.7   | 4MM | chr16:-4397663   |
| Off6: .T.....G.....T AA.    | 0.7   | 3MM | chr10:+35384261  |
| Off7: .A.A..A.....T A.      | 0.5   | 4MM | chr11:-82755370  |
| Off8: .....AT.C.....AA.     | 0.5   | 3MM | chr6:-124885038  |
| Off9: ..G.T...T.....T..     | 0.5   | 4MM | chr6:-41845311   |
| Off10: .....C..C...A...CA.  | 0.5   | 3MM | chr12:+103941450 |
| Off11: C...AC.....C...T..   | 0.4   | 4MM | chr13:+43290788  |
| Off12: .G...AA.....C...T..  | 0.4   | 4MM | chr8:+95318409   |
| Off13: ...CT.....A...A.     | 0.4   | 3MM | chr1:+11497683   |
| Off14: .A.T...G.....A. TA.  | 0.3   | 4MM | chr12:+13635268  |
| Off15: .A.A...G.....G... .. | 0.3   | 4MM | chr6:+41114906   |

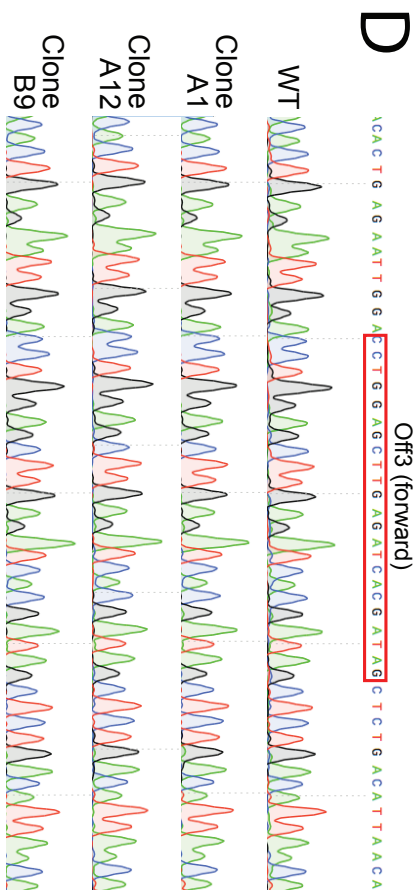

**B**

Off1 (forward)

WT

Clone A1

Clone A12

Clone B9

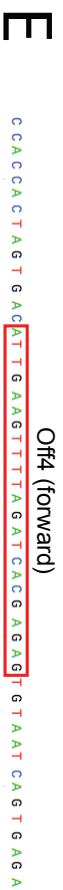

**C**

Off2 (forward)

WT

Clone A1

Clone A12

Clone B9

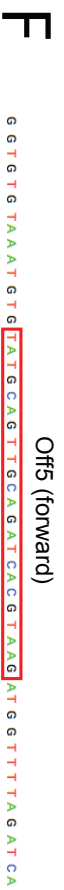

# Figure 3

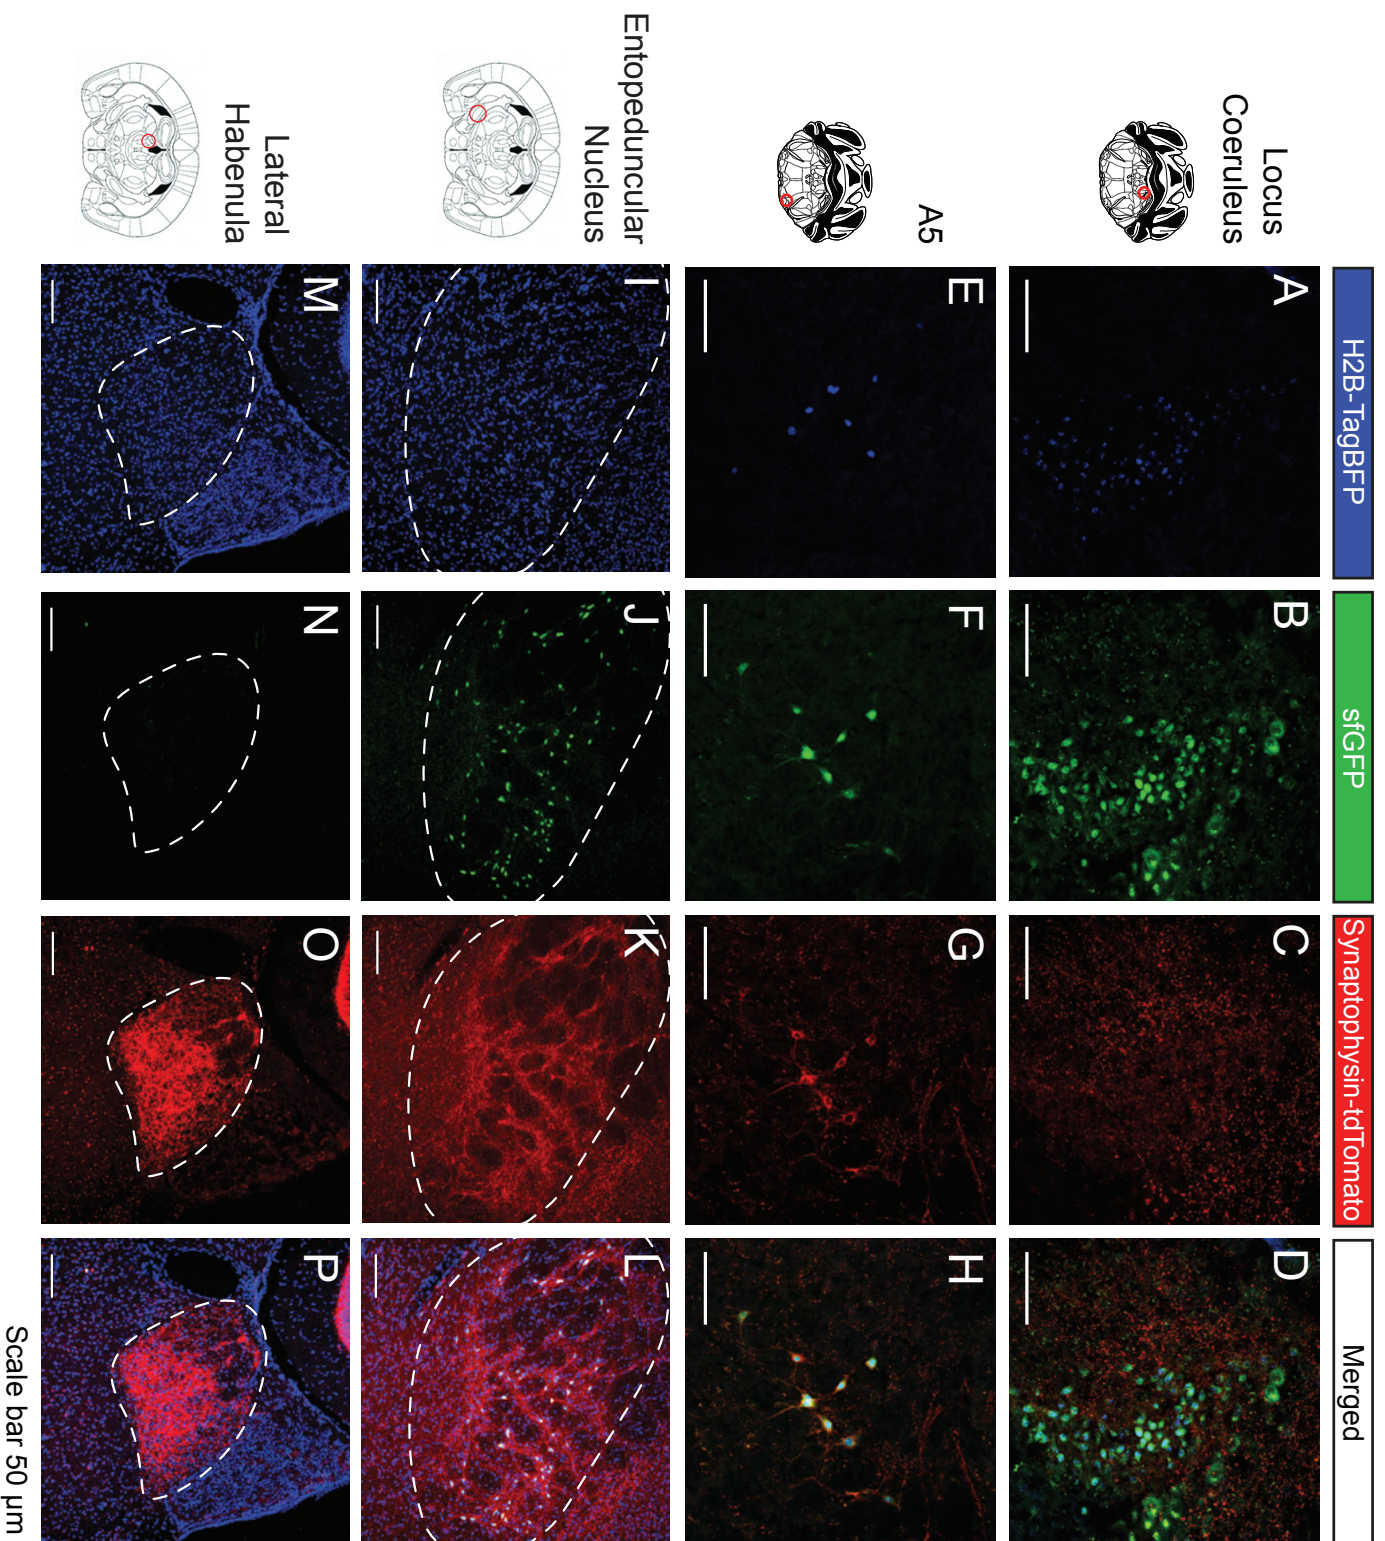



# Figure 4

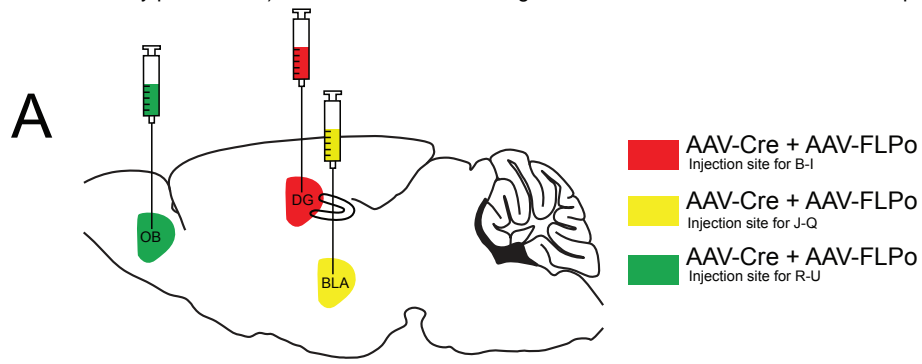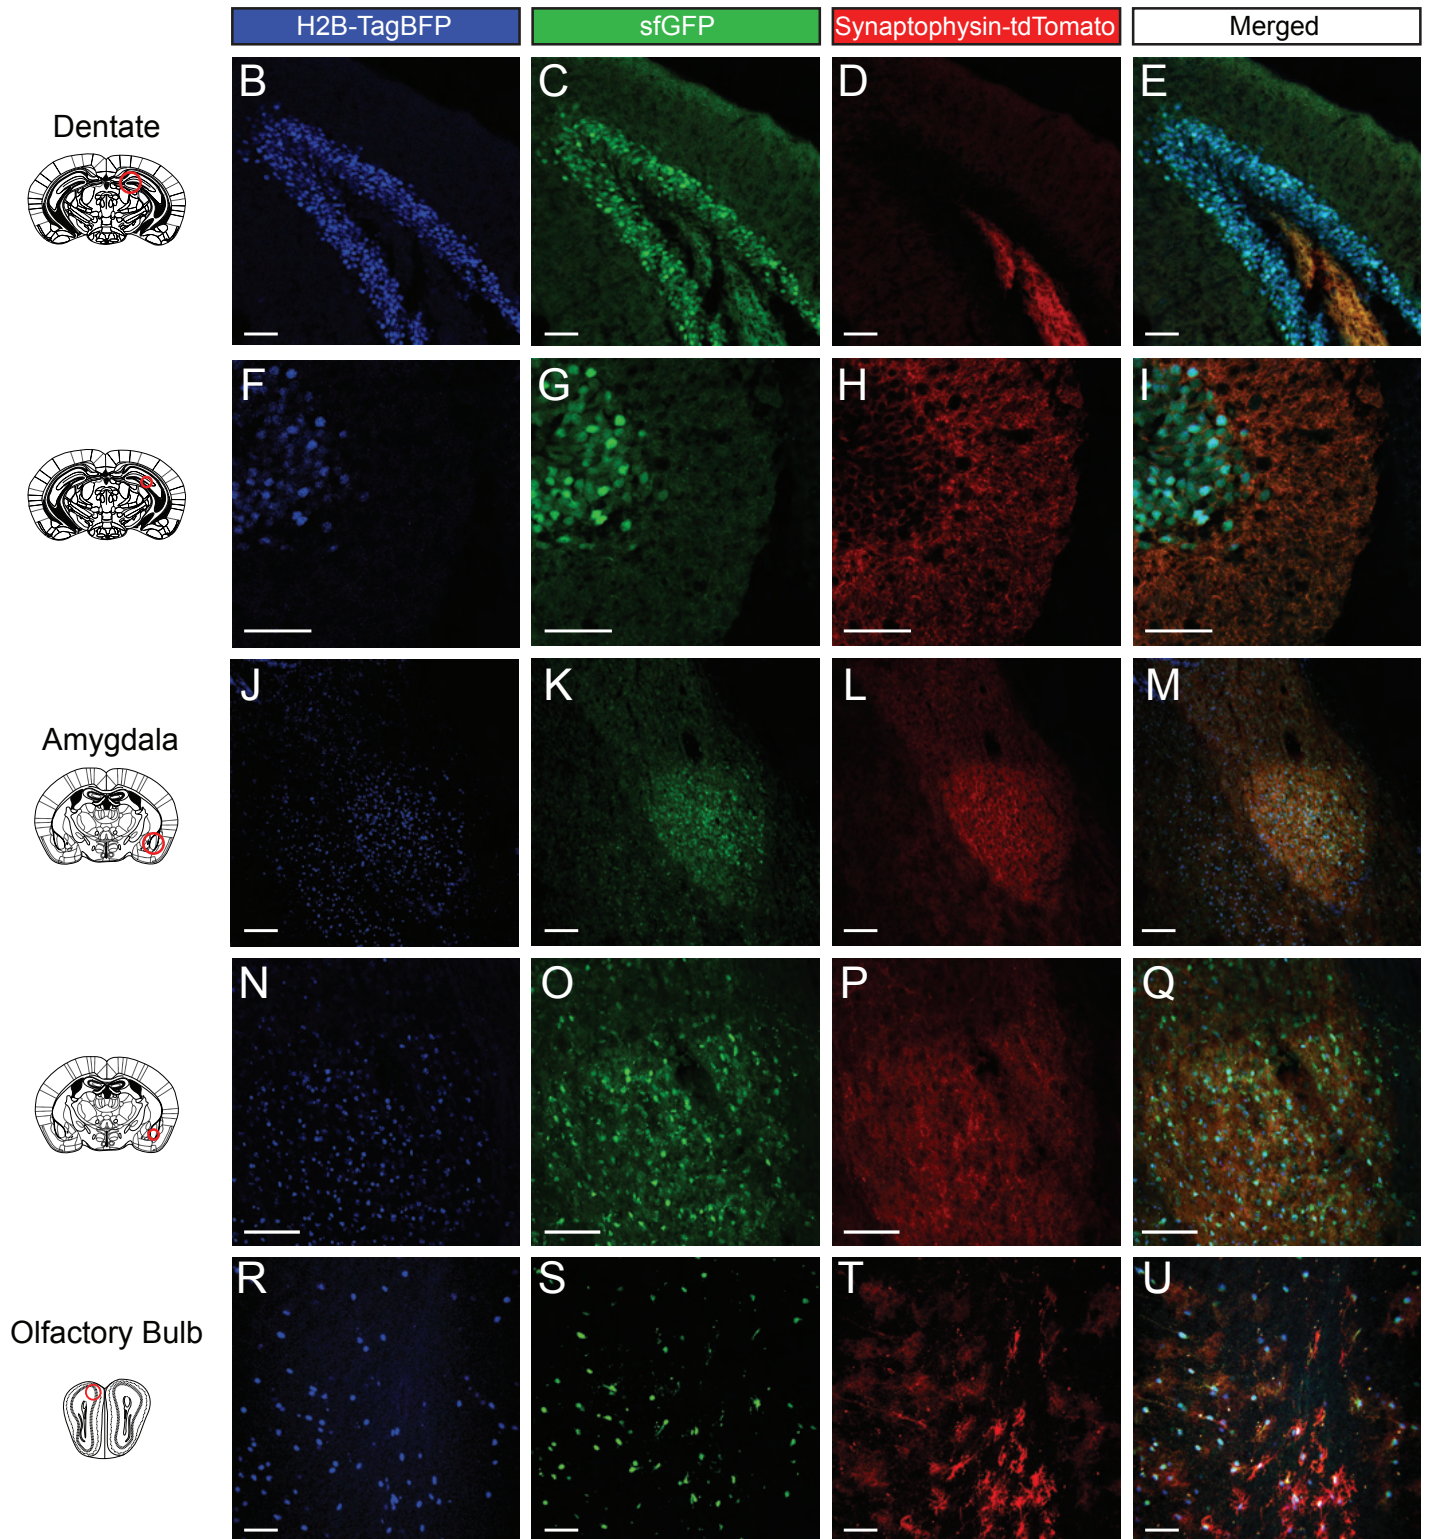

Scale bar 50  $\mu$ m



# Figure 5

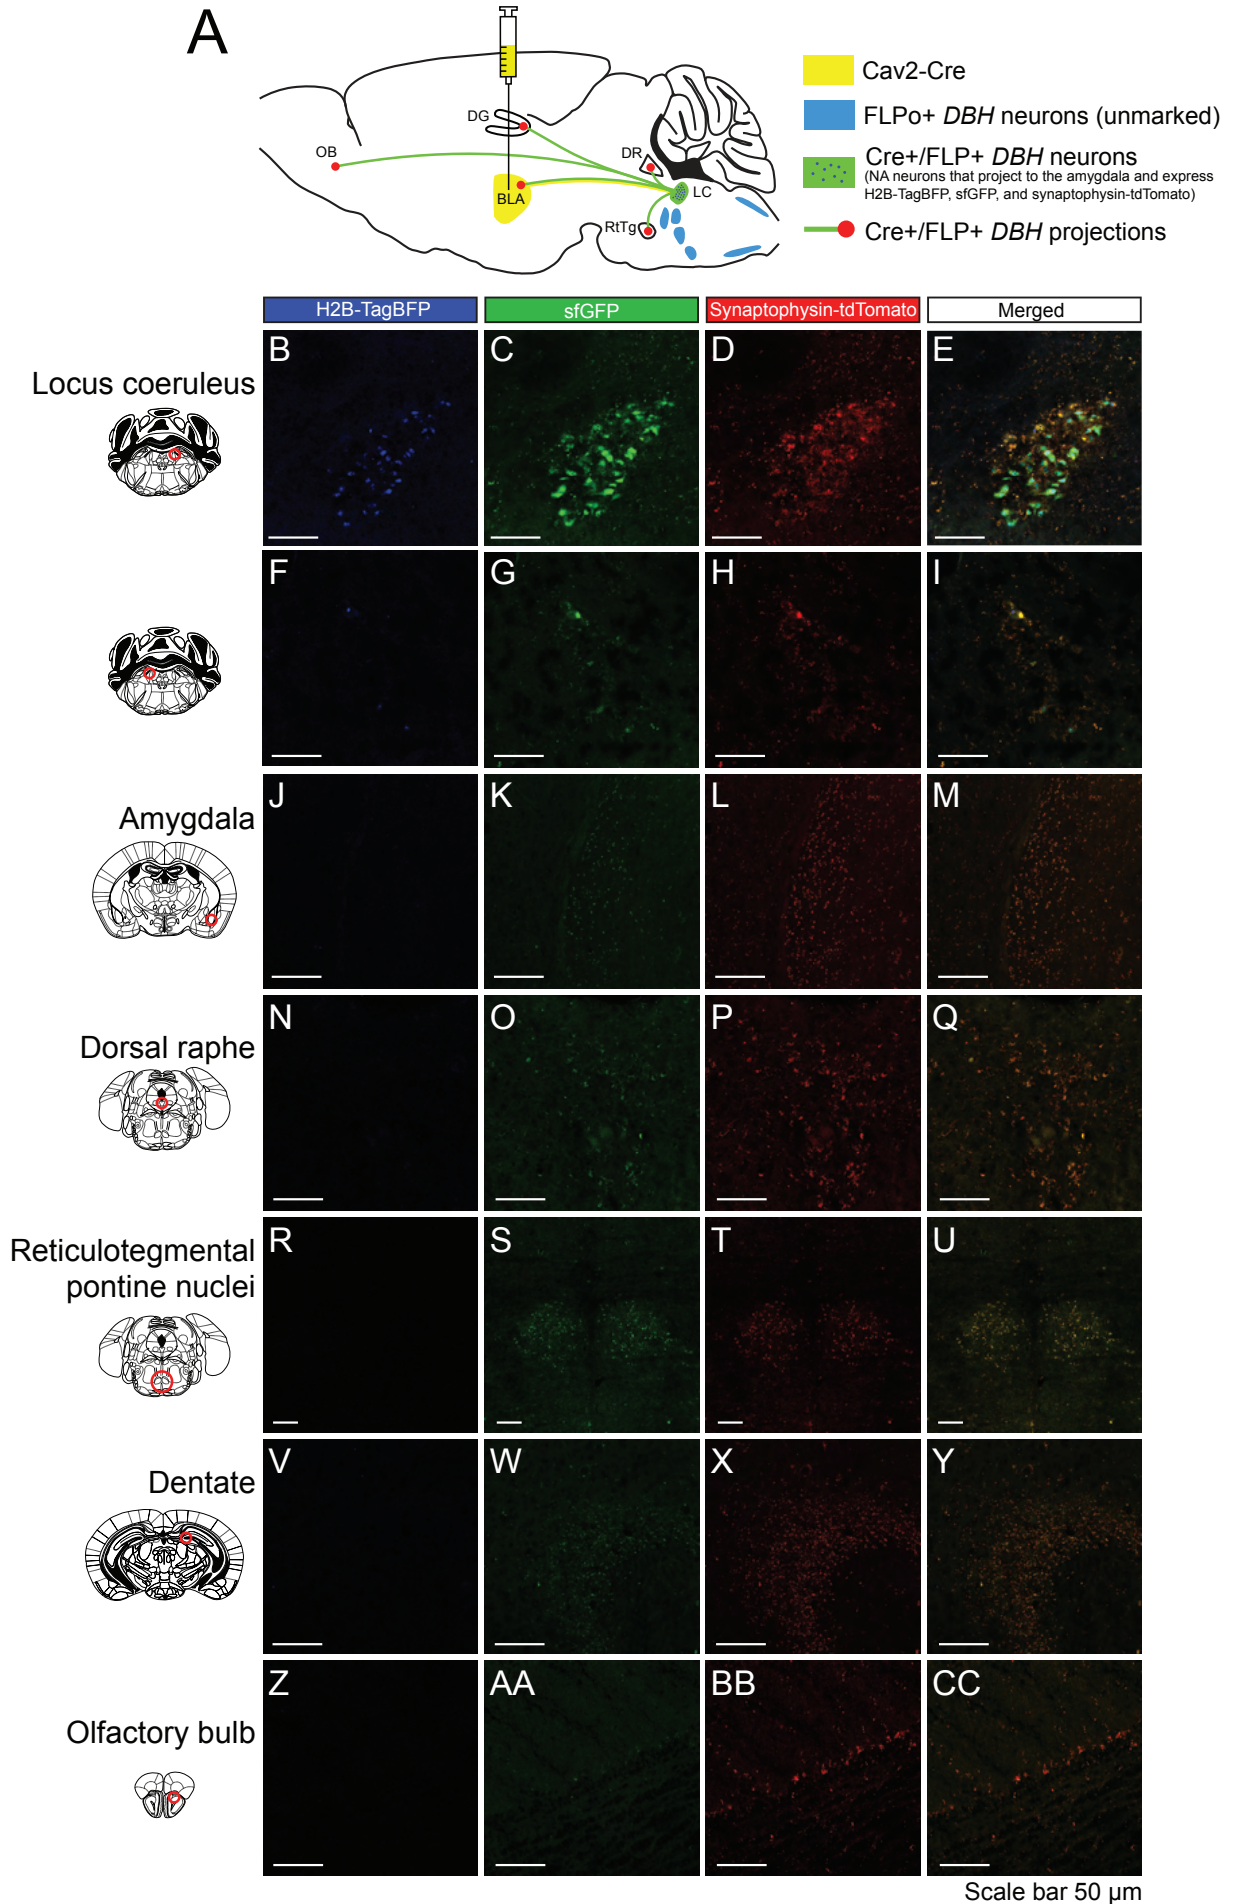

# Figure 6

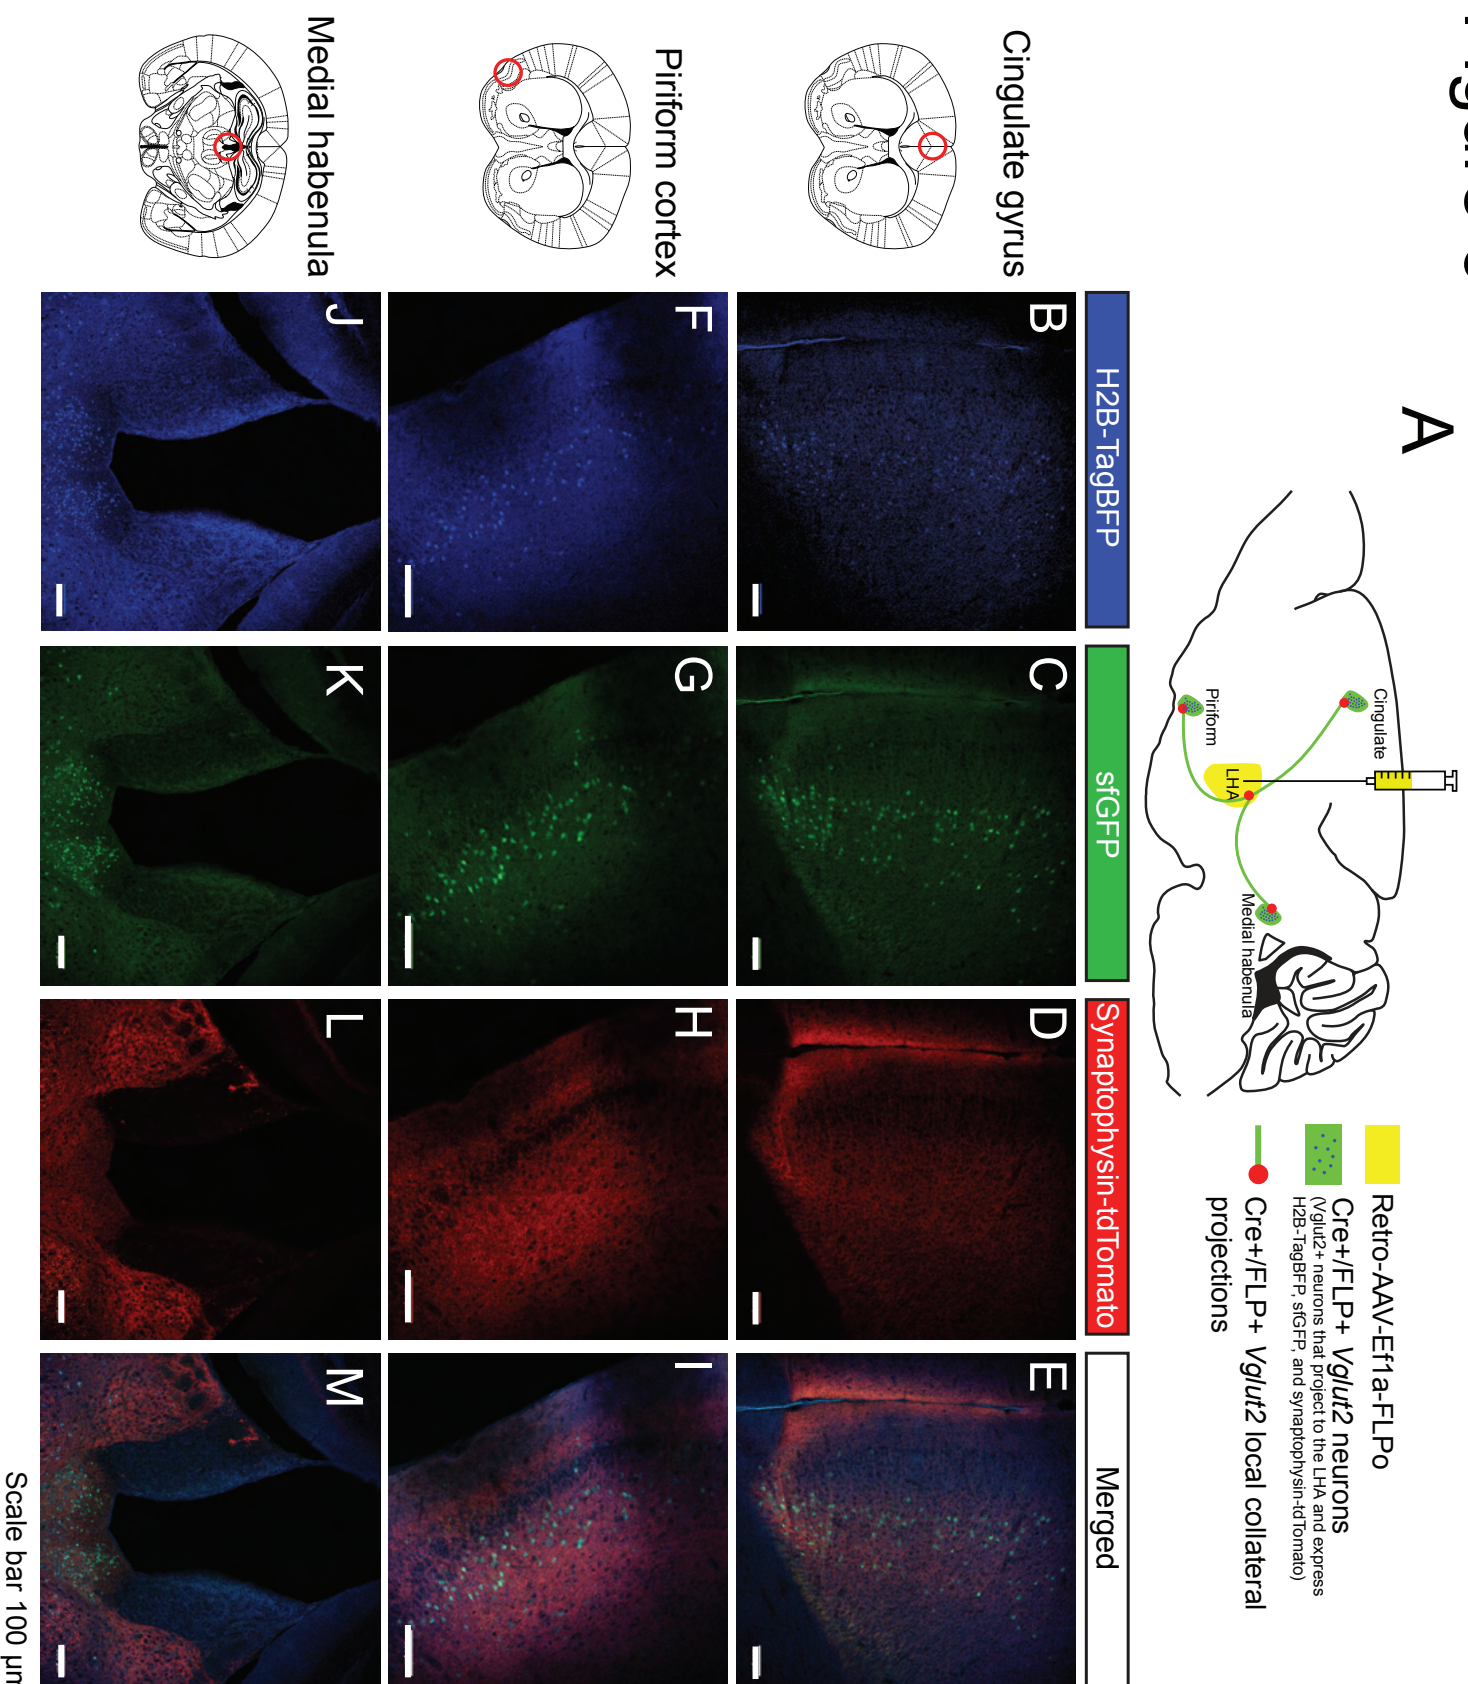

# Figure 7

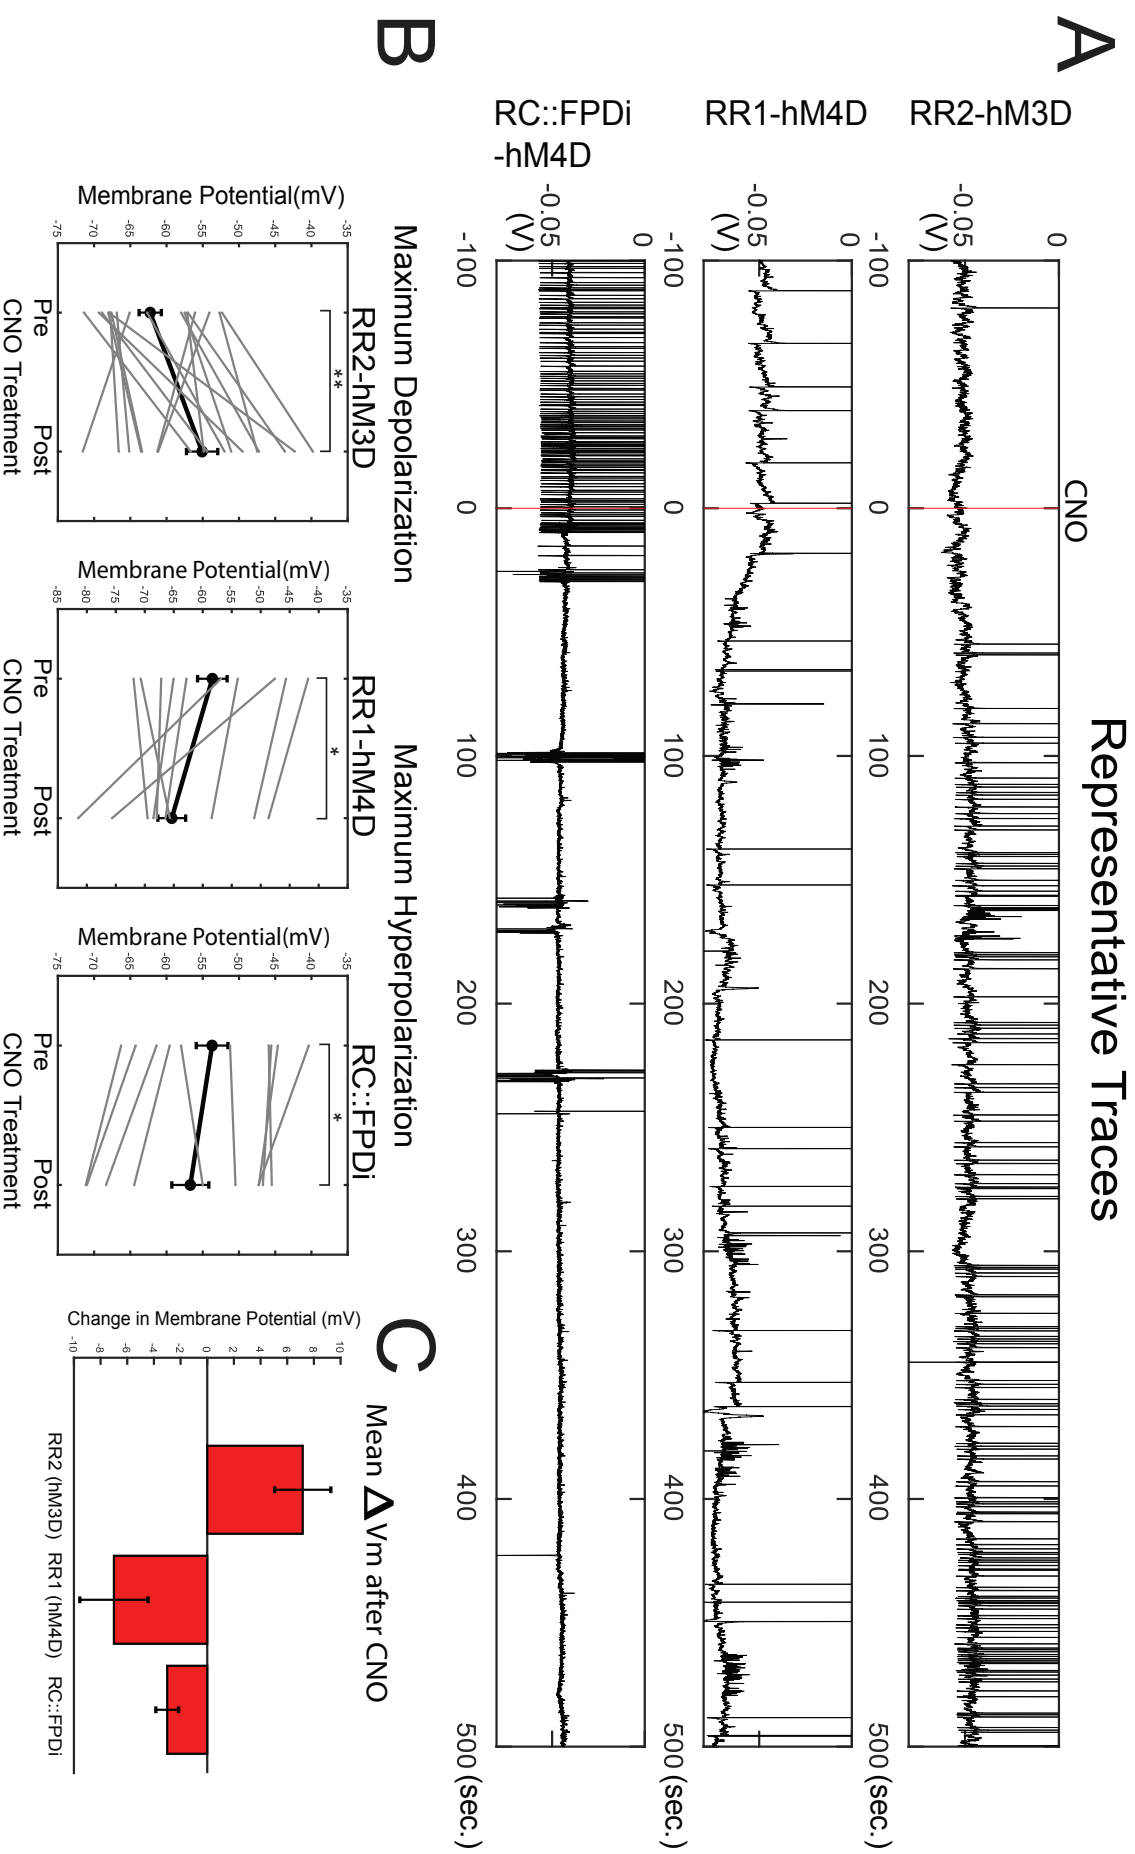



## Figure 8

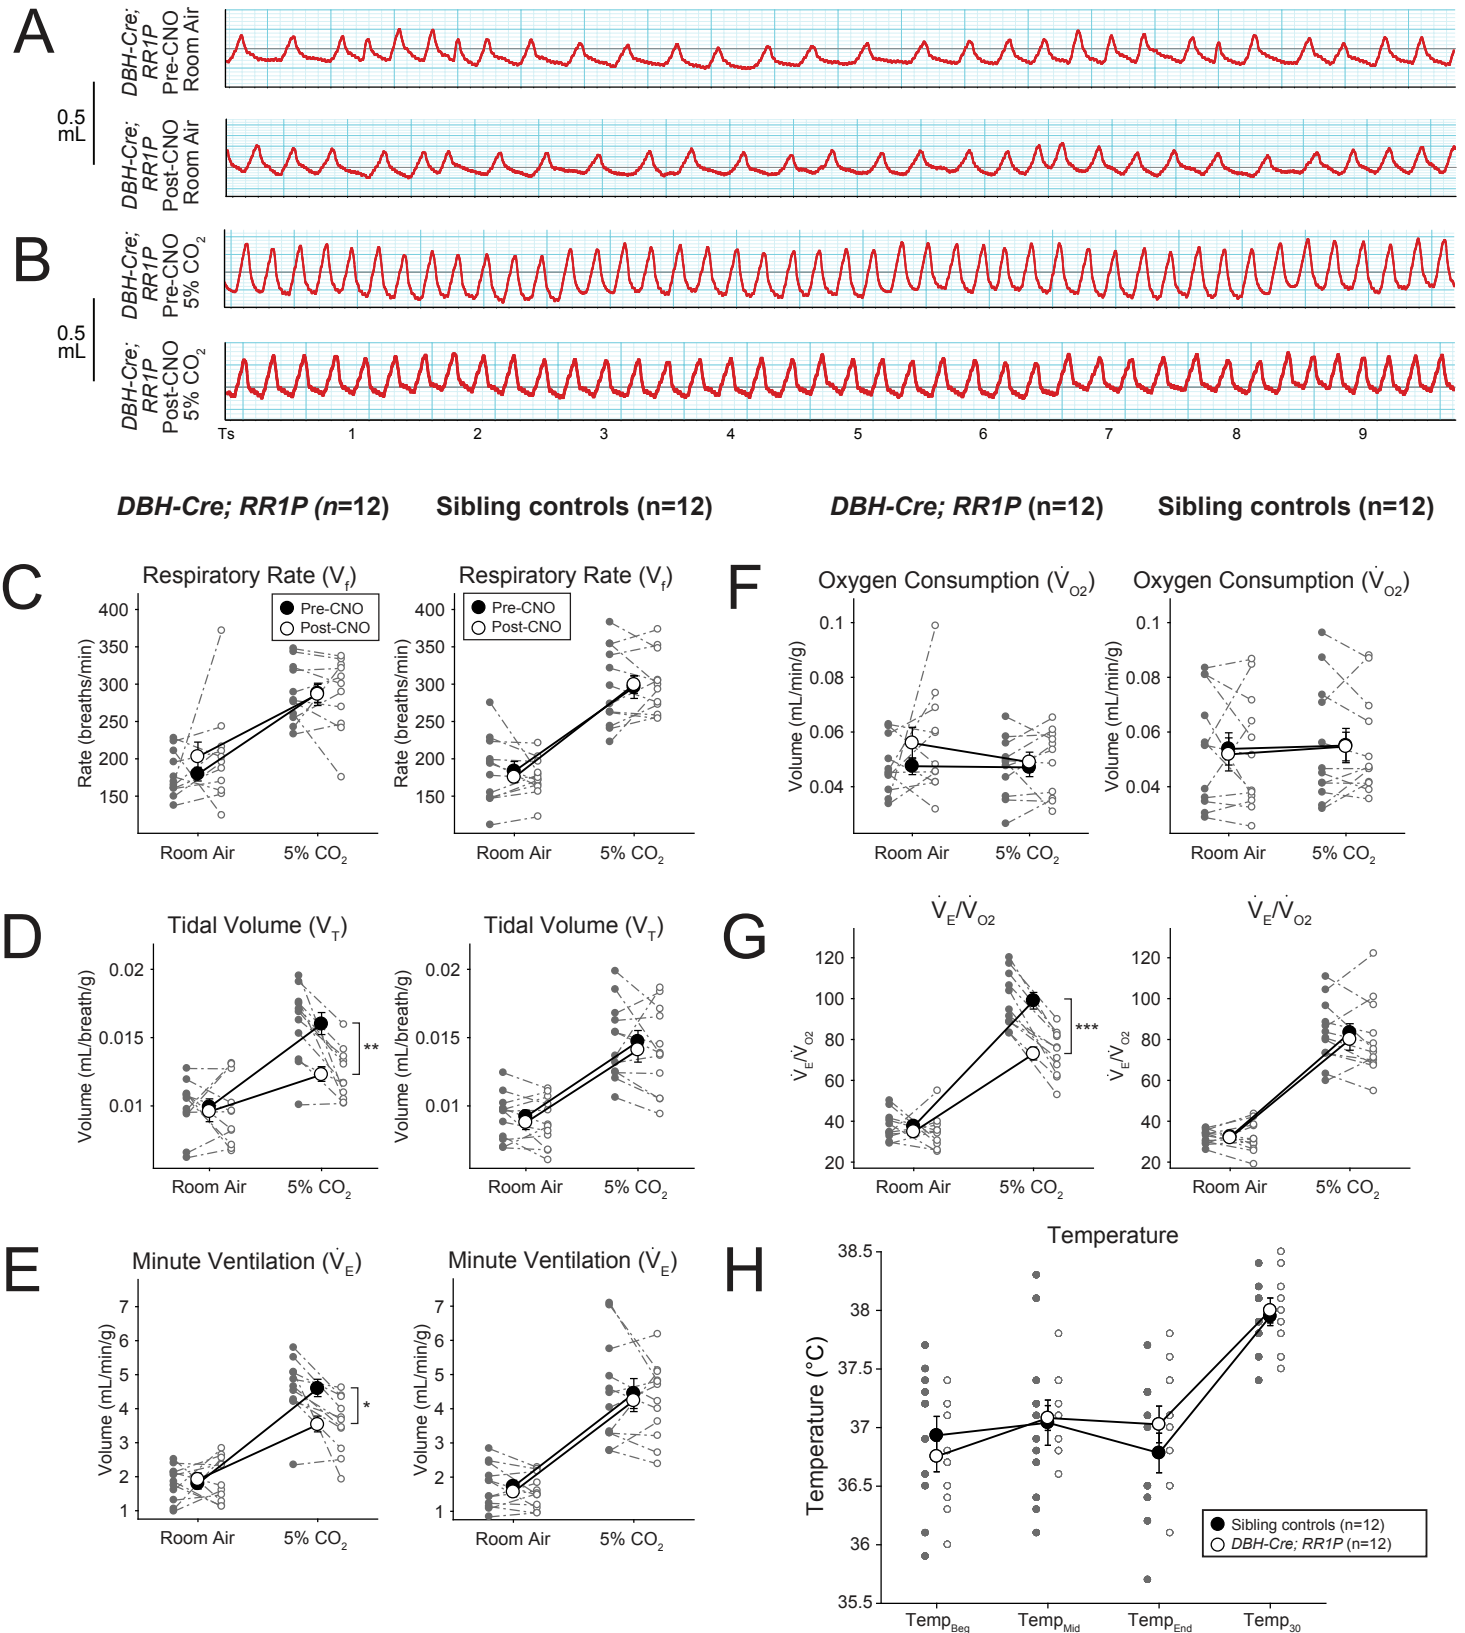

## Figure 9

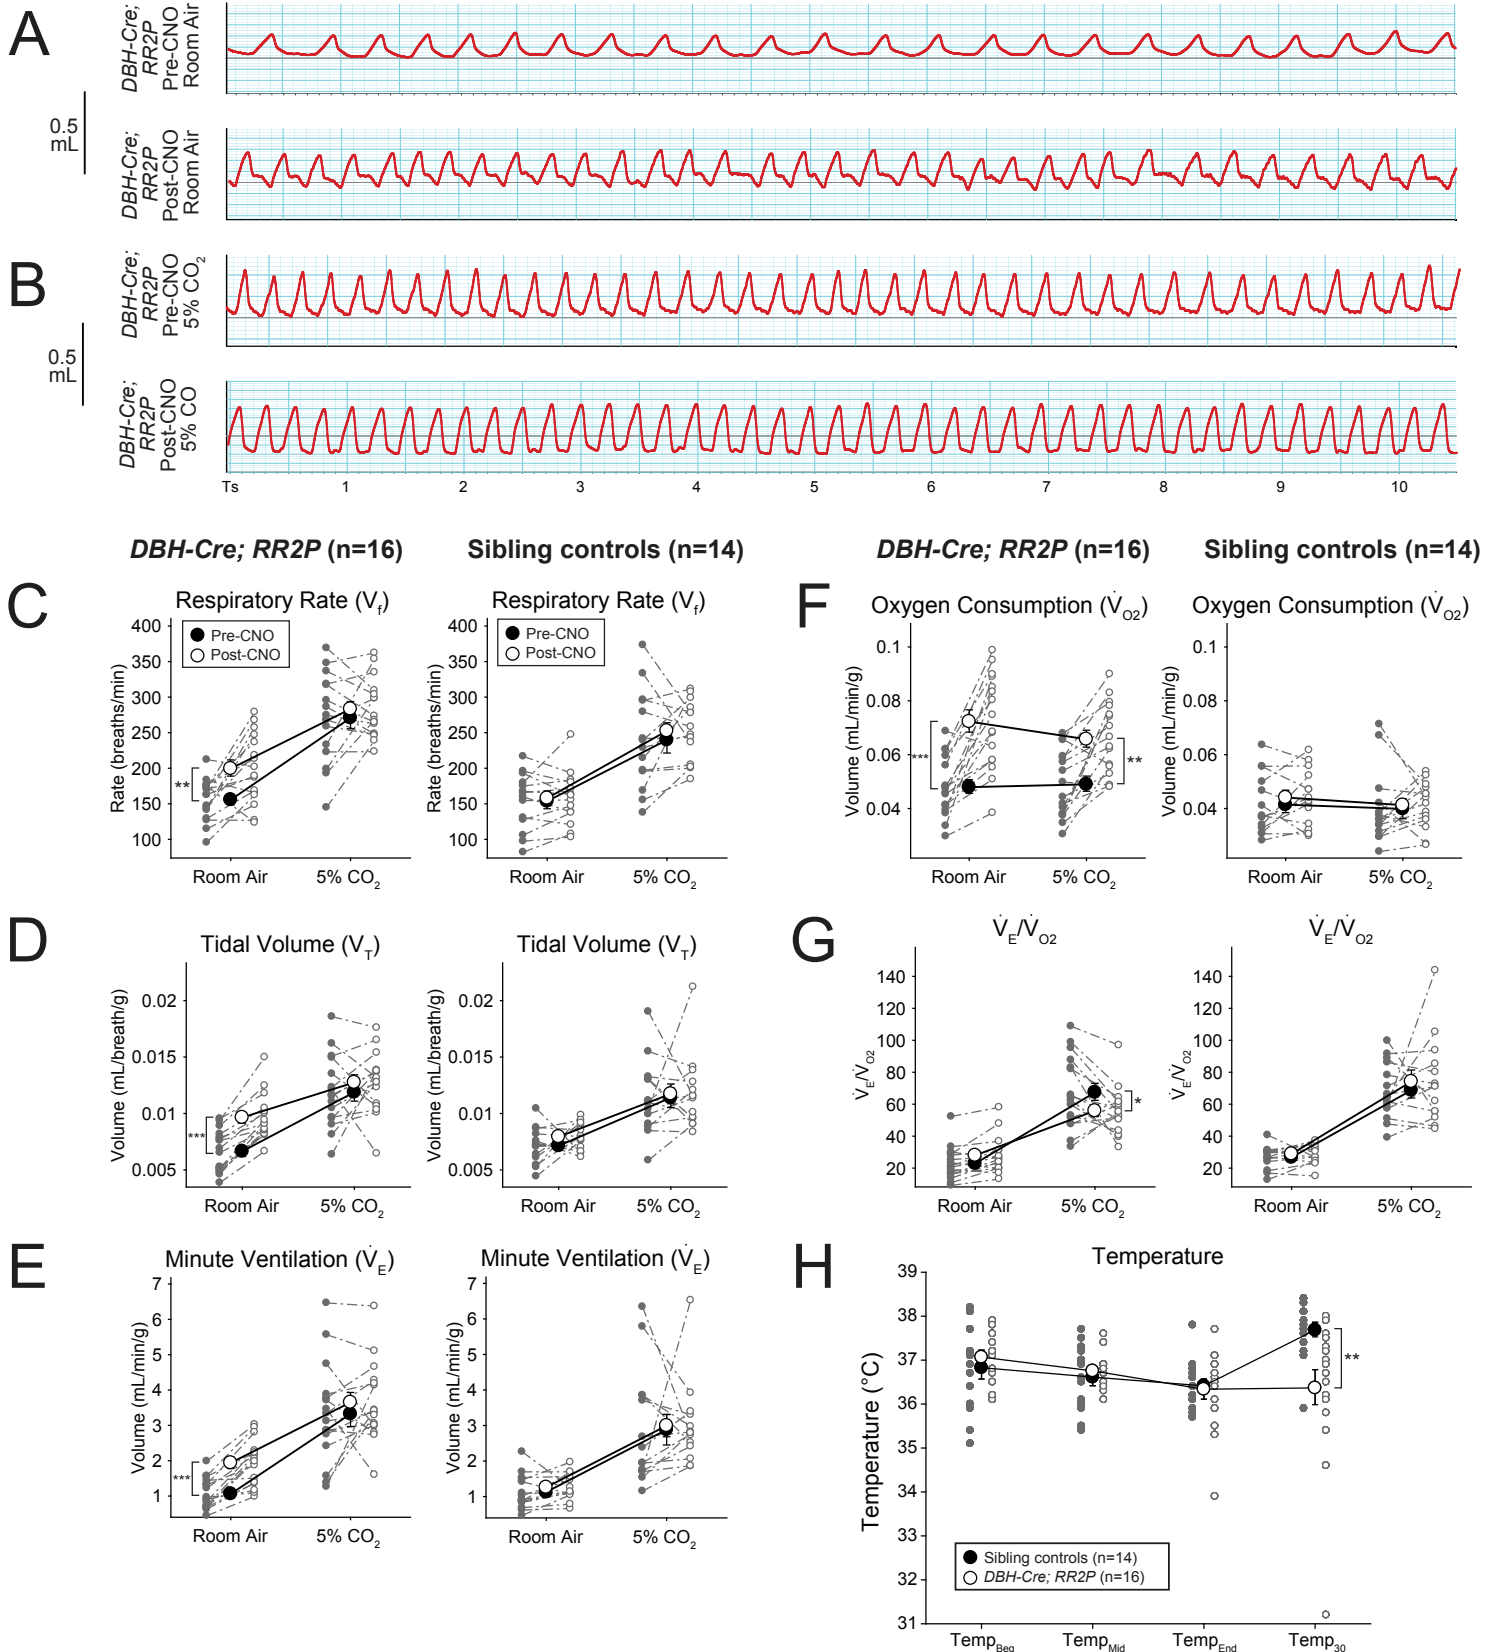

# Figure 10

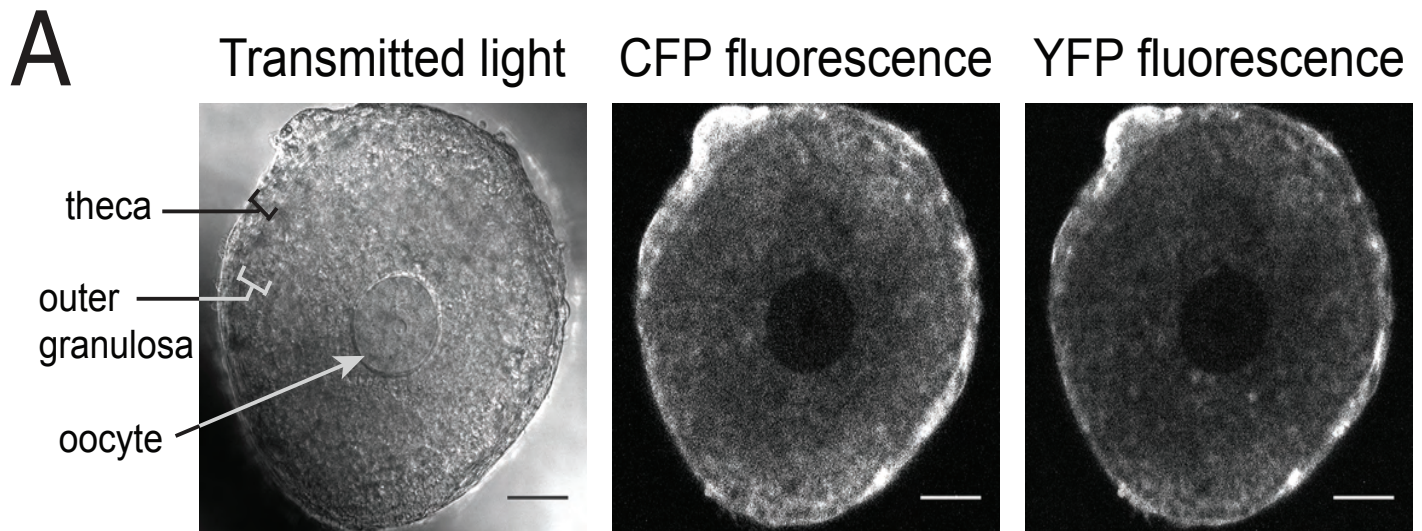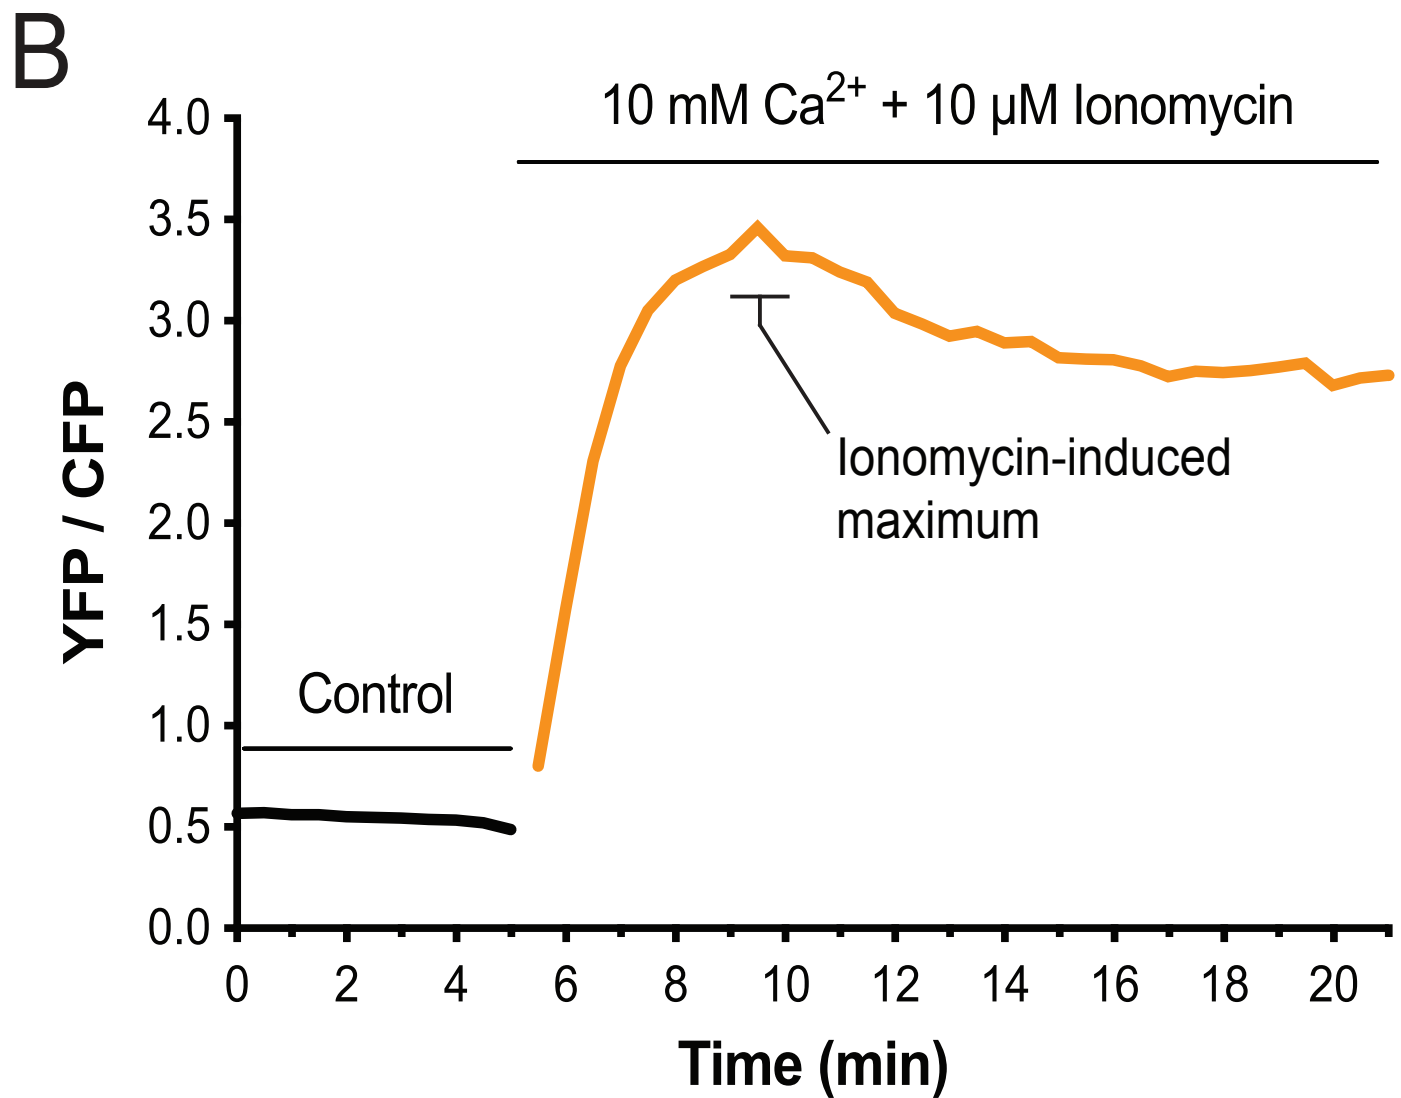

# Table 1

| Vector                                                                              | Function                                       | Addgene ID Number |
|-------------------------------------------------------------------------------------|------------------------------------------------|-------------------|
|   | Cas9 (px330) vector with sgRNA                 | 97007             |
|  | FLP and Cre responsive cloning vector          | 97012             |
|    | FLP and Cre responsive cloning vector (no neo) | 99142             |
|    | Cre responsive cloning vector                  | 97009             |
|    | FLP responsive cloning vector                  | 97010             |
|    | Dre responsive cloning vector                  | 97011             |
|     | Empty <i>Rosa26</i> targeting vector           | 97008             |

\*CS: Cloning site

## Table 2

| Short Name                                                                          | MMRRC ID   | Subtractive gene | Intersectional gene                              | Function                                           | Line status                |
|-------------------------------------------------------------------------------------|------------|------------------|--------------------------------------------------|----------------------------------------------------|----------------------------|
| <i>RR1*</i>                                                                         | 43516      | <i>mCherry</i>   | <i>hM4D</i>                                      | Metabotropic neuron perturbation                   | Established and functional |
| <i>Gt(ROSA)26Sor<sup>tm#(CAG-mCherry,-hM4D)</sup>Rray</i>                           |            |                  |                                                  |                                                    |                            |
| <i>RR2*</i>                                                                         | 43515      | <i>mCherry</i>   | <i>hM3D</i>                                      | Metabotropic neuron stimulation                    | Established and functional |
| <i>Gt(ROSA)26Sor<sup>tm#(CAG-mCherry,-hM3D)</sup>Rray</i>                           |            |                  |                                                  |                                                    |                            |
| <i>RR3*</i>                                                                         | 43518      | <i>mCherry</i>   | <i>EGFP-L10A</i>                                 | Translating mRNA pulldown                          | Established                |
| <i>Gt(ROSA)26Sor<sup>tm#(CAG-mCherry,-EGFP-L10A)</sup>Rray</i>                      |            |                  |                                                  |                                                    |                            |
| <i>RR4*</i>                                                                         | 43519      | <i>mCherry</i>   | <i>PSAM</i>                                      | Ionotropic neuron perturbation                     | Established                |
| <i>Gt(ROSA)26Sor<sup>tm#(CAG-mCherry,-PSAM)</sup>Rray</i>                           |            |                  |                                                  |                                                    |                            |
| <i>RR5</i>                                                                          | 43513      | None             | <i>H2B-TagBFP; sfGFP; synaptophysin-tdTomato</i> | Intersectional fluorescent marking                 | Established and functional |
| <i>Gt(ROSA)26Sor<sup>tm#(CAG-H2B-TagBFP-sfGFP-synaptophysin-tdTomato)</sup>Rray</i> |            |                  |                                                  |                                                    |                            |
| <i>RR6</i>                                                                          | 43517      | <i>mCherry</i>   | <i>Met-RS</i>                                    | Synthesized protein pulldown                       | Established                |
| <i>Gt(ROSA)26Sor<sup>tm#(CAG-mCherry,-MetRS)</sup>Rray</i>                          |            |                  |                                                  |                                                    |                            |
| <i>RR7</i>                                                                          | 43514      | <i>mCherry</i>   | <i>Rs-EGFP</i>                                   | Metabotropic Gs excitation                         | Established                |
| <i>Gt(ROSA)26Sor<sup>tm#(CAG-mCherry,-Rs-eGFP)</sup>Rray</i>                        |            |                  |                                                  |                                                    |                            |
| <i>RR8</i>                                                                          | <i>TBD</i> | None             | <i>Twitch2B</i>                                  | Ratiometric calcium imaging                        | Established and functional |
| <i>Gt(ROSA)26Sor<sup>tm#(CAG-Twitch2B)</sup>Rray</i>                                |            |                  |                                                  |                                                    |                            |
| <i>RR9</i>                                                                          |            | <i>tdTomato</i>  | <i>H2B-TagBFP; sfGFP</i>                         | Subtractive and intersectional fluorescent marking | Targeted ES cells          |
| <i>Gt(ROSA)26Sor<sup>tm#(CAG-tdTomato,-H2B-TagBFP-sfGFP)</sup>Rray</i>              |            |                  |                                                  |                                                    |                            |
| <i>RR10</i>                                                                         |            | None             | <i>H2B-TagBFP; sfGFP</i>                         | Dre-responsive fluorescent marking                 | Targeted ES cells          |
| <i>Gt(ROSA)26Sor<sup>tm#(CAG-H2B-TagBFP-sfGFP)</sup>Rray</i>                        |            |                  |                                                  |                                                    |                            |
| <i>RR11</i>                                                                         |            | None             | <i>H2B-TagBFP; sfGFP; synaptophysin-tdTomato</i> | Dre-responsive fluorescent marking                 | Targeted ES cells          |
| <i>Gt(ROSA)26Sor<sup>tm#(CAG-H2B-TagBFP-sfGFP-synaptophysin-tdTomato)</sup>Rray</i> |            |                  |                                                  |                                                    |                            |

Grey rows highlight Mouse Genome Informatics names; (tm#) are currently being determined

\*Made using an earlier Rosa26 targeting vector without CRISPR/Cas9



# Table 3

| RR1-4 ES cell targeting vectors without Cas9                         |            |             |              |
|----------------------------------------------------------------------|------------|-------------|--------------|
| Knock-in Cassette                                                    | Short name | Length      | Efficiency   |
|                                                                      | RR1        | 9312 bps    | 6/48 (13%)   |
|                                                                      | RR2        | 9328 bps    | 3/48 (6%)    |
|                                                                      | RR3        | 9006 bps    | 7/48 (14%)   |
|                                                                      | RR4        | 8790 bps    | 3/48 (6%)    |
| RR5 -ES cell Cas9 co-electroporation knock-in efficiencies.          |            |             |              |
| RR5 Knock-in Cassette (12641 bp)                                     |            | Cas9:Vector | Efficiency   |
|                                                                      |            | 0:1         | 3/48 (6%)    |
|                                                                      |            | 0.5:1       | 16/48 (33%)  |
|                                                                      |            | 1:1         | 13/48 (27%)  |
|                                                                      |            | 10:1        | 28/48 (58%)  |
| Multiplex ES cell cas9 knock-in efficiencies (Cas9 : Vector = 10.:1) |            |             |              |
| Knock-in Cassette                                                    | Short name | Length      | Efficiency   |
|                                                                      | RR6        | 11037 bps   | 6/48 (13%)   |
|                                                                      | RR7        | 9534 bps    | 1/48 (2%)    |
|                                                                      | RR9        | 9597 bps    | 6/48 (13%)   |
|                                                                      | RR11       | 9202 bps    | 5/48 (10%)   |
|                                                                      | RR10       | 6732 bps    | 9/48 (19%)   |
| Multiplex vector electroporation total                               |            |             |              |
|                                                                      |            |             | 25/48 (52%)  |
| Oocyte cas9 knock-in efficiencies                                    |            |             |              |
|                                                                      | RR8        | 6508 bps    | 1/1266 (<1%) |
